# Supplementary material for: Human Genetic Relevance and Potent Antitumor Activity of Heat Shock Protein 90 Inhibition in Canine Lung Adenocarcinoma Cell Lines
Source: PLoS One. 2015 Nov 11;10(11):e0142007. doi: 10.1371/journal.pone.0142007 (PMC4641597; doi:10.1371/journal.pone.0142007)
Supplement: S1 Table — Contains segmentation, classification of focal vs. large alterations and gene annotation. (XLSX) [file pone.0142007.s001.xlsx]

## Sheet: min 20-probe segmentation data
Cell line	Chromosome	Start Position (canFam2)	End Position (canFam2)	Mean Log2 ratio (threshold +/- 0.40)	Gain or Loss	Length (bp)	# Probes
BACA	1	19287301	19378801	0.553226	Gain	91501	38
BACA	1	53679001	53728501	-1.01569	Loss	49501	25
BACA	1	104920501	105062101	0.419512	Gain	141601	60
BACA	2	3000001	10672201	-0.821411	Loss	7672201	2248
BACA	2	10687201	17236501	-0.809707	Loss	6549301	2624
BACA	2	17237200	17432101	-0.496129	Loss	194902	105
BACA	2	17433250	25248601	-0.814002	Loss	7815352	3143
BACA	2	25250701	28539301	-0.729233	Loss	3288601	1468
BACA	2	28542601	30876601	-0.874861	Loss	2334001	972
BACA	2	30879001	41235601	-0.73608	Loss	10356601	4512
BACA	2	41238901	48678301	-0.80957	Loss	7439401	3198
BACA	2	48690601	50085001	-0.902333	Loss	1394401	630
BACA	2	50112301	51338701	-0.772097	Loss	1226401	534
BACA	2	51351301	58056601	-0.779082	Loss	6705301	2869
BACA	2	86828450	86887250	-0.620468	Loss	58801	73
BACA	3	56458501	56629201	-0.69505	Loss	170701	73
BACA	4	44200801	44312701	-0.693436	Loss	111901	44
BACA	4	81534601	81580801	0.524132	Gain	46201	20
BACA	5	59579701	59637901	-0.692614	Loss	58201	27
BACA	5	73878601	74713801	-0.84003	Loss	835201	365
BACA	5	81156601	81463201	-0.826404	Loss	306601	99
BACA	5	87869101	87935401	-0.665977	Loss	66301	27
BACA	6	46135599	46210801	1.03589	Gain	75203	31
BACA	7	83234701	83416801	-0.683206	Loss	182101	70
BACA	7	83868301	83998201	-0.727254	Loss	129901	28
BACA	8	19963201	20924401	-0.908746	Loss	961201	371
BACA	8	76371265	77306701	0.726753	Gain	935437	242
BACA	9	10518315	10977053	-0.787922	Loss	458739	60
BACA	9	11666450	11710300	-0.431975	Loss	43851	42
BACA	9	11750800	12045918	-1.28447	Loss	295119	44
BACA	9	13465201	13503301	-0.564911	Loss	38101	31
BACA	9	19874401	20114950	-0.715898	Loss	240550	143
BACA	9	20115001	20444460	-0.455518	Loss	329460	409
BACA	9	21001026	21507500	-0.719163	Loss	506475	173
BACA	9	63859801	63972301	-0.423012	Loss	112501	42
BACA	11	3004650	44014201	0.448921	Gain	41009552	16649
BACA	11	44257501	44333401	-2.8178	Loss	75901	37
BACA	11	44505301	54318601	0.425584	Gain	9813301	4144
BACA	11	54320701	59553001	-0.693538	Loss	5232301	2347
BACA	11	59554501	65396401	-0.859397	Loss	5841901	2445
BACA	11	65399101	77414701	-0.738191	Loss	12015601	4833
BACA	13	3031050	13060201	1.12724	Gain	10029152	4256
BACA	13	13062001	16885501	1.04334	Gain	3823501	1505
BACA	13	16897501	18633301	1.12985	Gain	1735801	743
BACA	13	18645901	29053801	1.11628	Gain	10407901	4667
BACA	13	29101801	31485301	1.10338	Gain	2383501	1083
BACA	13	31488301	31563901	-3.40378	Loss	75601	36
BACA	13	31565701	38611501	1.04274	Gain	7045801	3179
BACA	13	38612701	40989901	0.930824	Gain	2377201	951
BACA	13	40992001	56403901	1.07558	Gain	15411901	6503
BACA	13	56419201	57292501	1.14922	Gain	873301	328
BACA	13	57307201	58852801	1.074	Gain	1545601	527
BACA	13	58881601	64987801	1.06503	Gain	6106201	2231
BACA	13	65005801	66180001	1.13819	Gain	1174201	432
BACA	14	5279701	5805301	0.798263	Gain	525601	139
BACA	14	9771601	11306401	-0.646701	Loss	1534801	680
BACA	14	11308501	14122501	-0.897976	Loss	2814001	1184
BACA	14	14145001	14544350	-0.91262	Loss	399350	181
BACA	14	14591816	17394601	-0.823396	Loss	2802786	1121
BACA	16	3374401	4893001	-0.697307	Loss	1518601	622
BACA	16	4899901	9200101	-0.877303	Loss	4300201	1851
BACA	16	9202501	16367701	-0.772929	Loss	7165201	3049
BACA	16	16369801	18386701	-0.593448	Loss	2016901	828
BACA	16	18387601	31224901	-0.728614	Loss	12837301	5270
BACA	16	31227001	51311401	-0.836338	Loss	20084401	8436
BACA	16	51324001	56642401	-0.895576	Loss	5318401	2110
BACA	16	56680801	61671601	-0.87246	Loss	4990801	1878
BACA	16	61674601	62519632	-0.597405	Loss	845032	220
BACA	17	59755413	59877611	-0.460125	Loss	122199	91
BACA	18	21440701	21535900	-1.04319	Loss	95200	31
BACA	18	21537000	21826050	-0.541069	Loss	289051	77
BACA	18	30669001	30741901	-1.00399	Loss	72901	33
BACA	18	33244501	33279601	0.587425	Gain	35101	29
BACA	18	53121601	58854100	0.4436	Gain	5732500	2182
BACA	19	16273201	16325701	-0.760223	Loss	52501	20
BACA	19	22849850	23039101	0.429253	Gain	189252	25
BACA	19	23048101	23328901	-1.15794	Loss	280801	123
BACA	19	36189601	36252301	-0.76237	Loss	62701	21
BACA	20	33415501	33488701	-0.975872	Loss	73201	36
BACA	21	32380547	32437501	-2.47374	Loss	56955	22
BACA	21	48218401	49760401	-0.61118	Loss	1542001	604
BACA	22	44008201	44451001	-0.915374	Loss	442801	173
BACA	23	3500701	3681301	-0.807486	Loss	180601	63
BACA	23	23530801	23768101	-0.626892	Loss	237301	99
BACA	26	21374401	22033379	-0.601124	Loss	658979	322
BACA	26	24809401	25859401	-0.711743	Loss	1050001	459
BACA	26	27736801	28084072	0.476328	Gain	347272	130
BACA	26	28092852	28817930	0.894518	Gain	725079	104
BACA	26	28819780	30231601	0.542875	Gain	1411822	582
BACA	26	30284701	40824901	0.447367	Gain	10540201	4271
BACA	27	28717501	28914901	-0.784745	Loss	197401	76
BACA	32	41655301	41718500	-1.07793	Loss	63200	23
BACA	33	23694301	23898001	-0.914601	Loss	203701	94
BACA	34	41882701	41952001	-0.698865	Loss	69301	27
BACA	34	42048001	42124801	-1.03948	Loss	76801	33
BACA	36	7100401	7434301	0.801309	Gain	333901	144
BACA	36	11692801	12108601	0.423053	Gain	415801	195
BACA	36	13948801	14505001	0.841002	Gain	556201	252
BACA	36	25714801	25912201	0.910186	Gain	197401	83
BACA	38	19014301	19208701	-0.725713	Loss	194401	85
BACA	38	21271501	24237901	-0.743326	Loss	2966401	1269
BACA	38	24252301	26462401	-0.644114	Loss	2210101	819
BACA	Un (unmapped)	61669	9766980	0.632725	Gain	9705312	398
BACA	Un (unmapped)	42079750	42106468	-1.61259	Loss	26719	29
BACA	X	3001	1819801	-0.682639	Loss	1816801	787
BACA	X	1820701	2861007	-0.891082	Loss	1040307	488
BACA	X	2878274	4226401	-0.877097	Loss	1348128	621
BACA	X	4227301	6600301	-0.746086	Loss	2373001	1086
BACA	X	73556401	73640701	-2.69183	Loss	84301	35
BACA	X	124124473	124183501	0.603789	Gain	59029	36
CLAC	1	110892300	110918900	-1.23772	Loss	26601	20
CLAC	2	26046750	26072101	-1.52869	Loss	25352	24
CLAC	2	27955201	32202601	-0.40573	Loss	4247401	1848
CLAC	2	86820300	86903500	0.727483	Gain	83201	79
CLAC	3	7984501	10551301	-0.472714	Loss	2566801	1055
CLAC	3	22081501	26813701	-0.460591	Loss	4732201	1944
CLAC	3	34555501	34639501	-1.08348	Loss	84001	30
CLAC	3	35760301	39937801	-0.440363	Loss	4177501	1213
CLAC	3	52609201	54041401	-0.427392	Loss	1432201	620
CLAC	3	68405701	70751101	-0.416852	Loss	2345401	1019
CLAC	3	77803201	83472001	-0.454735	Loss	5668801	2246
CLAC	3	83501101	86260801	-0.503021	Loss	2759701	1031
CLAC	4	21113401	21408301	-0.493885	Loss	294901	106
CLAC	5	81193501	81405601	0.618863	Gain	212101	75
CLAC	6	41845501	43500601	0.418933	Gain	1655101	717
CLAC	6	46120501	46210801	0.864669	Gain	90301	32
CLAC	7	83868301	83998201	-0.510857	Loss	129901	28
CLAC	8	3030953	7631401	0.719821	Gain	4600449	1809
CLAC	8	7633501	12549601	0.544927	Gain	4916101	1946
CLAC	8	12562201	20204401	0.638239	Gain	7642201	3209
CLAC	8	20206201	28864501	0.518844	Gain	8658301	3328
CLAC	8	28875301	45131101	0.633231	Gain	16255801	6915
CLAC	8	45133501	54642901	0.700007	Gain	9509401	4173
CLAC	8	54644101	55937701	0.521113	Gain	1293601	600
CLAC	8	55952701	62298601	0.581985	Gain	6345901	2772
CLAC	8	62300701	70901401	0.67706	Gain	8600701	3559
CLAC	8	70903501	76618353	0.770499	Gain	5714853	2017
CLAC	8	76619101	76737901	1.40542	Gain	118801	33
CLAC	8	76813359	77090701	1.2742	Gain	277343	92
CLAC	8	77106601	77306701	0.744264	Gain	200101	46
CLAC	9	13463401	13502000	0.920339	Gain	38600	30
CLAC	9	20114950	20448301	-0.793111	Loss	333352	415
CLAC	9	20449560	20643660	-0.423695	Loss	194101	245
CLAC	9	21016201	21567001	0.661345	Gain	550801	200
CLAC	11	44123101	44217601	-4.96478	Loss	94501	39
CLAC	11	44219701	44270101	-2.08436	Loss	50401	22
CLAC	11	44272201	45767401	-3.76466	Loss	1495201	651
CLAC	11	45771601	52896901	-0.455736	Loss	7125301	2953
CLAC	11	60056701	63065101	-0.482067	Loss	3008401	1241
CLAC	13	3031050	11166601	1.27715	Gain	8135552	3475
CLAC	13	11168101	17967601	0.976636	Gain	6799501	2733
CLAC	13	17982301	37520701	1.10478	Gain	19538401	8792
CLAC	13	37523701	41964301	1.18868	Gain	4440601	1846
CLAC	13	41967301	51935101	1.04824	Gain	9967801	4269
CLAC	13	51952201	61626301	0.962642	Gain	9674101	3680
CLAC	13	61639801	64121101	0.994662	Gain	2481301	909
CLAC	13	64142701	66180001	1.036	Gain	2037301	766
CLAC	14	5279701	5805301	0.765351	Gain	525601	139
CLAC	14	20706001	21241801	0.48242	Gain	535801	229
CLAC	15	22545901	28936501	-0.403943	Loss	6390601	2766
CLAC	15	28950601	32868001	-0.469	Loss	3917401	1607
CLAC	15	59781601	61107601	-0.514419	Loss	1326001	470
CLAC	15	61120801	63240001	-0.478203	Loss	2119201	811
CLAC	15	63243001	63343201	-3.83616	Loss	100201	32
CLAC	15	63353401	67209601	-0.432119	Loss	3856201	1450
CLAC	16	4212250	4280401	-1.07605	Loss	68152	55
CLAC	16	4287800	4324250	-2.71763	Loss	36451	21
CLAC	16	4325350	7917301	-0.46025	Loss	3591952	1500
CLAC	16	31178701	35927101	-0.467843	Loss	4748401	1990
CLAC	16	39858001	42642901	-0.516945	Loss	2784901	1101
CLAC	16	50503250	54916801	-0.502535	Loss	4413552	1828
CLAC	16	54921301	62519632	-0.412986	Loss	7598332	2791
CLAC	17	3001900	5445301	0.548032	Gain	2443402	1103
CLAC	17	5447401	8666701	0.413725	Gain	3219301	1483
CLAC	17	8668801	12079501	0.529494	Gain	3410701	1573
CLAC	17	17163301	19106101	0.505879	Gain	1942801	862
CLAC	17	20683201	22686901	0.434353	Gain	2003701	863
CLAC	17	22699201	26348701	0.496887	Gain	3649501	1486
CLAC	17	36582001	43527301	0.48502	Gain	6945301	2995
CLAC	17	51269701	53524801	0.502734	Gain	2255101	948
CLAC	17	53609701	59758013	0.456201	Gain	6148313	2462
CLAC	17	59863711	67222850	0.44659	Gain	7359140	2714
CLAC	18	5968201	7730101	-0.424117	Loss	1761901	658
CLAC	18	28984201	34470001	-0.409116	Loss	5485801	2388
CLAC	18	42654601	43770901	-0.441033	Loss	1116301	410
CLAC	18	51416401	52334401	0.600447	Gain	918001	377
CLAC	18	52337101	55507201	1.38703	Gain	3170101	1194
CLAC	18	55509601	56832001	1.12387	Gain	1322401	499
CLAC	19	7018201	9006901	-0.465788	Loss	1988701	801
CLAC	19	9043801	14725801	-0.490029	Loss	5682001	2271
CLAC	19	27165901	30777601	-0.463682	Loss	3611701	1363
CLAC	19	35319601	37753801	-0.475682	Loss	2434201	1033
CLAC	19	43457401	46958101	-0.448795	Loss	3500701	1472
CLAC	19	46974901	48399001	-0.529867	Loss	1424101	622
CLAC	19	48400801	53133901	-0.407387	Loss	4733101	1825
CLAC	20	14432101	14845801	-0.401849	Loss	413701	178
CLAC	20	17440501	19660201	-0.532347	Loss	2219701	937
CLAC	20	19681201	21663001	-0.517642	Loss	1981801	873
CLAC	20	23883301	27354901	-0.415847	Loss	3471601	1537
CLAC	20	30799201	34656301	-0.478921	Loss	3857101	1744
CLAC	20	50148301	50664601	-0.413455	Loss	516301	164
CLAC	21	3031450	7619401	-0.503124	Loss	4587952	1560
CLAC	21	10694701	15305101	-0.493618	Loss	4610401	1920
CLAC	21	16804201	22467901	-0.454447	Loss	5663701	2328
CLAC	21	30147001	30326101	-0.592234	Loss	179101	51
CLAC	21	30353401	33768001	-0.433232	Loss	3414601	1354
CLAC	21	45920701	48187201	-0.450116	Loss	2266501	875
CLAC	21	48190201	49768801	-1.02021	Loss	1578601	618
CLAC	21	49772101	54016452	-0.400864	Loss	4244352	1636
CLAC	22	46206301	46386901	-0.828679	Loss	180601	73
CLAC	23	7080901	9631201	-0.427981	Loss	2550301	1012
CLAC	23	23556301	23746801	0.637643	Gain	190501	82
CLAC	23	23749801	27336301	-0.49366	Loss	3586501	1445
CLAC	23	41076901	46842601	-0.428725	Loss	5765701	2415
CLAC	23	48957601	51246001	-0.444271	Loss	2288401	877
CLAC	24	45473401	45511201	-0.446008	Loss	37801	17
CLAC	25	6359401	12167701	-0.414594	Loss	5808301	2401
CLAC	25	18524401	19240501	-0.492484	Loss	716101	291
CLAC	25	23661001	28982401	-0.464075	Loss	5321401	2135
CLAC	25	37726501	37995001	-0.560172	Loss	268501	97
CLAC	25	43371901	44950501	-0.454334	Loss	1578601	712
CLAC	26	30284701	30559950	-0.494394	Loss	275250	72
CLAC	28	20311201	24093301	-0.477656	Loss	3782101	1595
CLAC	29	16702501	28658701	-0.420278	Loss	11956201	4992
CLAC	29	28692301	30132901	-0.439742	Loss	1440601	616
CLAC	29	31997701	41057101	-0.453819	Loss	9059401	3694
CLAC	30	5646901	10022701	-0.409981	Loss	4375801	1845
CLAC	30	15231301	16501801	-0.523132	Loss	1270501	415
CLAC	30	22091101	23553601	-0.534024	Loss	1462501	561
CLAC	30	42972001	43193101	-0.441743	Loss	221101	77
CLAC	32	11760601	12264001	-0.996357	Loss	503401	217
CLAC	32	16264501	16662901	-2.87076	Loss	398401	157
CLAC	32	16663801	19213201	-0.499354	Loss	2549401	975
CLAC	33	23614501	23662801	-4.49526	Loss	48301	24
CLAC	33	23809801	24097501	-3.78983	Loss	287701	135
CLAC	34	3018200	3836701	0.49485	Gain	818502	317
CLAC	34	22640701	25561201	0.407365	Gain	2920501	1338
CLAC	34	28938001	30620101	0.404184	Gain	1682101	717
CLAC	36	3001501	4269301	-0.986385	Loss	1267801	519
CLAC	36	4272001	7020301	-0.812252	Loss	2748301	1153
CLAC	36	7080601	13421101	-0.839025	Loss	6340501	2716
CLAC	36	13450201	18994801	-0.854116	Loss	5544601	2369
CLAC	36	24775801	25943701	0.856007	Gain	1167901	518
CLAC	36	25945801	27627901	0.59032	Gain	1682101	739
CLAC	36	29793601	33840025	-0.866652	Loss	4046425	1522
CLAC	37	6055201	8191501	-0.497499	Loss	2136301	861
CLAC	37	21744601	25916401	-0.438898	Loss	4171801	1825
CLAC	37	29205601	31348801	-0.421957	Loss	2143201	870
CLAC	38	5885101	8240101	-0.496665	Loss	2355001	946
CLAC	38	8256001	14681701	-0.452014	Loss	6425701	2663
CLAC	38	22089601	22422901	-0.574304	Loss	333301	145
CLAC	X	27087901	27438601	-3.19704	Loss	350701	156
CLAC	X	81677401	81770101	-3.1805	Loss	92701	29

## Sheet: CNA segments called
Legend: yellow, suspected large copy number alteration regions merged (CNAs); grey, possible large CNAs of lower confidence
Cell line	Chromosome	Start Position (canFam2)	End Position (canFam2)	Mean Log2 ratio (threshold 0.40 gain; 0.45 loss)	Gain or Loss	Length (bp)	# Probes	Predicted large CNAs from combining segments, start	Predicted large CNAs from combining segments, end	Predicted CNAs combining segments, length	Candidate CNAs > 3Mb
BACA	1	19287301	19378801	0.553226	Gain	91501	38			91500	no
BACA	1	53679001	53728501	-1.01569	Loss	49501	25			49500	no
BACA	1	104920501	105062101	0.419512	Gain	141601	60			141600	no
BACA	2	3000001	10672201	-0.821411	Loss	7672201	2248	3000001	58056601	55056600	yes
BACA	2	10687201	17236501	-0.809707	Loss	6549301	2624
BACA	2	17237200	17432101	-0.496129	Loss	194902	105
BACA	2	17433250	25248601	-0.814002	Loss	7815352	3143
BACA	2	25250701	28539301	-0.729233	Loss	3288601	1468
BACA	2	28542601	30876601	-0.874861	Loss	2334001	972
BACA	2	30879001	41235601	-0.73608	Loss	10356601	4512
BACA	2	41238901	48678301	-0.80957	Loss	7439401	3198
BACA	2	48690601	50085001	-0.902333	Loss	1394401	630
BACA	2	50112301	51338701	-0.772097	Loss	1226401	534
BACA	2	51351301	58056601	-0.779082	Loss	6705301	2869
BACA	2	86828450	86887250	-0.620468	Loss	58801	73			58800	no
BACA	3	56458501	56629201	-0.69505	Loss	170701	73			170700	no
BACA	4	44200801	44312701	-0.693436	Loss	111901	44			111900	no
BACA	4	81534601	81580801	0.524132	Gain	46201	20			46200	no
BACA	5	59579701	59637901	-0.692614	Loss	58201	27			58200	no
BACA	5	73878601	74713801	-0.84003	Loss	835201	365			835200	no
BACA	5	81156601	81463201	-0.826404	Loss	306601	99			306600	no
BACA	5	87869101	87935401	-0.665977	Loss	66301	27			66300	no
BACA	6	46135599	46210801	1.03589	Gain	75203	31			75202	no
BACA	7	83234701	83416801	-0.683206	Loss	182101	70			182100	no
BACA	7	83868301	83998201	-0.727254	Loss	129901	28			129900	no
BACA	8	19963201	20924401	-0.908746	Loss	961201	371			961200	no
BACA	8	76371265	77306701	0.726753	Gain	935437	242			935436	no
BACA	9	10518315	10977053	-0.787922	Loss	458739	60			458738	no
BACA	9	11750800	12045918	-1.28447	Loss	295119	44			295118	no
BACA	9	13465201	13503301	-0.564911	Loss	38101	31			38100	no
BACA	9	19874401	20114950	-0.715898	Loss	240550	143			240549	no
BACA	9	20115001	20444460	-0.455518	Loss	329460	409			329459	no
BACA	9	21001026	21507500	-0.719163	Loss	506475	173			506474	no
BACA	11	3004650	44014201	0.448921	Gain	41009552	16649			41009551	yes
BACA	11	44257501	44333401	-2.8178	Loss	75901	37			75900	no
BACA	11	44505301	54318601	0.425584	Gain	9813301	4144			9813300	yes
BACA	11	54320701	59553001	-0.693538	Loss	5232301	2347	54320701	77414701	23094000	yes
BACA	11	59554501	65396401	-0.859397	Loss	5841901	2445
BACA	11	65399101	77414701	-0.738191	Loss	12015601	4833
BACA	13	3031050	13060201	1.12724	Gain	10029152	4256	3031050	31485301	28454251	yes
BACA	13	13062001	16885501	1.04334	Gain	3823501	1505
BACA	13	16897501	18633301	1.12985	Gain	1735801	743
BACA	13	18645901	29053801	1.11628	Gain	10407901	4667
BACA	13	29101801	31485301	1.10338	Gain	2383501	1083
BACA	13	31488301	31563901	-3.40378	Loss	75601	36			75600	no
BACA	13	31565701	38611501	1.04274	Gain	7045801	3179	31565701	66180001	34614300	yes
BACA	13	38612701	40989901	0.930824	Gain	2377201	951
BACA	13	40992001	56403901	1.07558	Gain	15411901	6503
BACA	13	56419201	57292501	1.14922	Gain	873301	328
BACA	13	57307201	58852801	1.074	Gain	1545601	527
BACA	13	58881601	64987801	1.06503	Gain	6106201	2231
BACA	13	65005801	66180001	1.13819	Gain	1174201	432
BACA	14	5279701	5805301	0.798263	Gain	525601	139			525600	no
BACA	14	9771601	11306401	-0.646701	Loss	1534801	680			1534800	no
BACA	14	11308501	14122501	-0.897976	Loss	2814001	1184	11308501	17394601	6086100	yes
BACA	14	14145001	14544350	-0.91262	Loss	399350	181
BACA	14	14591816	17394601	-0.823396	Loss	2802786	1121
BACA	16	3374401	4893001	-0.697307	Loss	1518601	622	3374401	62519632	59145231	yes
BACA	16	4899901	9200101	-0.877303	Loss	4300201	1851
BACA	16	9202501	16367701	-0.772929	Loss	7165201	3049
BACA	16	16369801	18386701	-0.593448	Loss	2016901	828
BACA	16	18387601	31224901	-0.728614	Loss	12837301	5270
BACA	16	31227001	51311401	-0.836338	Loss	20084401	8436
BACA	16	51324001	56642401	-0.895576	Loss	5318401	2110
BACA	16	56680801	61671601	-0.87246	Loss	4990801	1878
BACA	16	61674601	62519632	-0.597405	Loss	845032	220
BACA	17	59755413	59877611	-0.460125	Loss	122199	91			122198	no
BACA	18	21440701	21535900	-1.04319	Loss	95200	31	21440701	21826050	385349	no
BACA	18	21537000	21826050	-0.541069	Loss	289051	77
BACA	18	30669001	30741901	-1.00399	Loss	72901	33			72900	no
BACA	18	33244501	33279601	0.587425	Gain	35101	29			35100	no
BACA	18	53121601	58854100	0.4436	Gain	5732500	2182			5732499	yes
BACA	19	16273201	16325701	-0.760223	Loss	52501	20			52500	no
BACA	19	22849850	23039101	0.429253	Gain	189252	25			189251	no
BACA	19	23048101	23328901	-1.15794	Loss	280801	123			280800	no
BACA	19	36189601	36252301	-0.76237	Loss	62701	21			62700	no
BACA	20	33415501	33488701	-0.975872	Loss	73201	36			73200	no
BACA	21	32380547	32437501	-2.47374	Loss	56955	22			56954	no
BACA	21	48218401	49760401	-0.61118	Loss	1542001	604			1542000	no
BACA	22	44008201	44451001	-0.915374	Loss	442801	173			442800	no
BACA	23	3500701	3681301	-0.807486	Loss	180601	63			180600	no
BACA	23	23530801	23768101	-0.626892	Loss	237301	99			237300	no
BACA	26	21374401	22033379	-0.601124	Loss	658979	322			658978	no
BACA	26	24809401	25859401	-0.711743	Loss	1050001	459			1050000	no
BACA	26	27736801	28084072	0.476328	Gain	347272	130	27736801	40824901	13088100	yes
BACA	26	28092852	28817930	0.894518	Gain	725079	104
BACA	26	28819780	30231601	0.542875	Gain	1411822	582
BACA	26	30284701	40824901	0.447367	Gain	10540201	4271
BACA	27	28717501	28914901	-0.784745	Loss	197401	76			197400	no
BACA	32	41655301	41718500	-1.07793	Loss	63200	23			63199	no
BACA	33	23694301	23898001	-0.914601	Loss	203701	94			203700	no
BACA	34	41882701	41952001	-0.698865	Loss	69301	27	41882701	42124801	242100	no
BACA	34	42048001	42124801	-1.03948	Loss	76801	33
BACA	36	7100401	7434301	0.801309	Gain	333901	144			333900	no
BACA	36	11692801	12108601	0.423053	Gain	415801	195			415800	no
BACA	36	13948801	14505001	0.841002	Gain	556201	252			556200	no
BACA	36	25714801	25912201	0.910186	Gain	197401	83			197400	no
BACA	38	19014301	19208701	-0.725713	Loss	194401	85			194400	no
BACA	38	21271501	24237901	-0.743326	Loss	2966401	1269	21271501	26462401	5190900	yes
BACA	38	24252301	26462401	-0.644114	Loss	2210101	819
BACA	Un	61669	9766980	0.632725	Gain	9705312	398			9705311	yes
BACA	Un	42079750	42106468	-1.61259	Loss	26719	29			26718	no
BACA	X	3001	1819801	-0.682639	Loss	1816801	787	3001	6600301	6597300	yes
BACA	X	1820701	2861007	-0.891082	Loss	1040307	488
BACA	X	2878274	4226401	-0.877097	Loss	1348128	621
BACA	X	4227301	6600301	-0.746086	Loss	2373001	1086
BACA	X	73556401	73640701	-2.69183	Loss	84301	35			84300	no
BACA	X	124124473	124183501	0.603789	Gain	59029	36			59028	no
CLAC	1	110892300	110918900	-1.23772	Loss	26601	20			26600	no
CLAC	2	26046750	26072101	-1.52869	Loss	25352	24			25351	no
CLAC	2	86820300	86903500	0.727483	Gain	83201	79			83200	no
CLAC	3	7984501	10551301	-0.472714	Loss	2566801	1055			2566800	no
CLAC	3	22081501	26813701	-0.460591	Loss	4732201	1944			4732200	yes
CLAC	3	34555501	34639501	-1.08348	Loss	84001	30			84000	no
CLAC	3	77803201	83472001	-0.454735	Loss	5668801	2246	77803201	86260801	8457600	yes
CLAC	3	83501101	86260801	-0.503021	Loss	2759701	1031
CLAC	4	21113401	21408301	-0.493885	Loss	294901	106			294900	no
CLAC	5	81193501	81405601	0.618863	Gain	212101	75			212100	no
CLAC	6	41845501	43500601	0.418933	Gain	1655101	717			1655100	no
CLAC	6	46120501	46210801	0.864669	Gain	90301	32			90300	no
CLAC	7	83868301	83998201	-0.510857	Loss	129901	28			129900	no
CLAC	8	3030953	7631401	0.719821	Gain	4600449	1809	3030953	77306701	74275748	yes
CLAC	8	7633501	12549601	0.544927	Gain	4916101	1946
CLAC	8	12562201	20204401	0.638239	Gain	7642201	3209
CLAC	8	20206201	28864501	0.518844	Gain	8658301	3328
CLAC	8	28875301	45131101	0.633231	Gain	16255801	6915
CLAC	8	45133501	54642901	0.700007	Gain	9509401	4173
CLAC	8	54644101	55937701	0.521113	Gain	1293601	600
CLAC	8	55952701	62298601	0.581985	Gain	6345901	2772
CLAC	8	62300701	70901401	0.67706	Gain	8600701	3559
CLAC	8	70903501	76618353	0.770499	Gain	5714853	2017
CLAC	8	76619101	76737901	1.40542	Gain	118801	33
CLAC	8	76813359	77090701	1.2742	Gain	277343	92
CLAC	8	77106601	77306701	0.744264	Gain	200101	46
CLAC	9	13463401	13502000	0.920339	Gain	38600	30			38599	no
CLAC	9	20114950	20448301	-0.793111	Loss	333352	415			333351	no
CLAC	9	21016201	21567001	0.661345	Gain	550801	200			550800	no
CLAC	11	44123101	44217601	-4.96478	Loss	94501	39	44123101	52896901	8773800	yes
CLAC	11	44219701	44270101	-2.08436	Loss	50401	22
CLAC	11	44272201	45767401	-3.76466	Loss	1495201	651
CLAC	11	45771601	52896901	-0.455736	Loss	7125301	2953
CLAC	11	60056701	63065101	-0.482067	Loss	3008401	1241			3008401	yes
CLAC	13	3031050	11166601	1.27715	Gain	8135552	3475	3031050	66180001	63148951	yes
CLAC	13	11168101	17967601	0.976636	Gain	6799501	2733
CLAC	13	17982301	37520701	1.10478	Gain	19538401	8792
CLAC	13	37523701	41964301	1.18868	Gain	4440601	1846
CLAC	13	41967301	51935101	1.04824	Gain	9967801	4269
CLAC	13	51952201	61626301	0.962642	Gain	9674101	3680
CLAC	13	61639801	64121101	0.994662	Gain	2481301	909
CLAC	13	64142701	66180001	1.036	Gain	2037301	766
CLAC	14	5279701	5805301	0.765351	Gain	525601	139			525600	no
CLAC	14	20706001	21241801	0.48242	Gain	535801	229			535800	no
CLAC	15	28950601	32868001	-0.469	Loss	3917401	1607			3917400	yes
CLAC	15	59781601	61107601	-0.514419	Loss	1326001	470	59781601	63343201	3561600	yes
CLAC	15	61120801	63240001	-0.478203	Loss	2119201	811
CLAC	15	63243001	63343201	-3.83616	Loss	100201	32
CLAC	16	4212250	4280401	-1.07605	Loss	68152	55	4212250	7917301	3705051	yes
CLAC	16	4287800	4324250	-2.71763	Loss	36451	21
CLAC	16	4325350	7917301	-0.46025	Loss	3591952	1500
CLAC	16	31178701	35927101	-0.467843	Loss	4748401	1990			4748400	yes
CLAC	16	39858001	42642901	-0.516945	Loss	2784901	1101			2784900	no
CLAC	16	50503250	54916801	-0.502535	Loss	4413552	1828			4413551	yes
CLAC	17	3001900	5445301	0.548032	Gain	2443402	1103	3001900	12079501	9077601	yes
CLAC	17	5447401	8666701	0.413725	Gain	3219301	1483
CLAC	17	8668801	12079501	0.529494	Gain	3410701	1573
CLAC	17	17163301	19106101	0.505879	Gain	1942801	862			1942800	no
CLAC	17	20683201	22686901	0.434353	Gain	2003701	863	20683201	26348701	5665500	yes
CLAC	17	22699201	26348701	0.496887	Gain	3649501	1486
CLAC	17	36582001	43527301	0.48502	Gain	6945301	2995			6945300	yes
CLAC	17	51269701	53524801	0.502734	Gain	2255101	948	51269701	59758013	8488312	yes
CLAC	17	53609701	59758013	0.456201	Gain	6148313	2462
CLAC	17	59863711	67222850	0.44659	Gain	7359140	2714			7359139	yes
CLAC	18	51416401	52334401	0.600447	Gain	918001	377	51416401	56832001	5415600	yes
CLAC	18	52337101	55507201	1.38703	Gain	3170101	1194
CLAC	18	55509601	56832001	1.12387	Gain	1322401	499
CLAC	19	7018201	9006901	-0.465788	Loss	1988701	801	7018201	14725801	7707600	yes
CLAC	19	9043801	14725801	-0.490029	Loss	5682001	2271
CLAC	19	27165901	30777601	-0.463682	Loss	3611701	1363			3611700	yes
CLAC	19	35319601	37753801	-0.475682	Loss	2434201	1033			2434200	no
CLAC	19	46974901	48399001	-0.529867	Loss	1424101	622			1424100	no
CLAC	20	17440501	19660201	-0.532347	Loss	2219701	937	17440501	21663001	4222500	yes
CLAC	20	19681201	21663001	-0.517642	Loss	1981801	873
CLAC	20	30799201	34656301	-0.478921	Loss	3857101	1744			3857100	yes
CLAC	21	3031450	7619401	-0.503124	Loss	4587952	1560			4587951	yes
CLAC	21	10694701	15305101	-0.493618	Loss	4610401	1920			4610400	yes
CLAC	21	16804201	22467901	-0.454447	Loss	5663701	2328			5663700	yes
CLAC	21	30147001	30326101	-0.592234	Loss	179101	51			179100	no
CLAC	21	45920701	48187201	-0.450116	Loss	2266501	875	45920701	49768801	3848100	yes
CLAC	21	48190201	49768801	-1.02021	Loss	1578601	618
CLAC	22	46206301	46386901	-0.828679	Loss	180601	73			180600	no
CLAC	23	23556301	23746801	0.637643	Gain	190501	82			190500	no
CLAC	23	23749801	27336301	-0.49366	Loss	3586501	1445			3586500	yes
CLAC	25	18524401	19240501	-0.492484	Loss	716101	291			716100	no
CLAC	25	23661001	28982401	-0.464075	Loss	5321401	2135			5321400	yes
CLAC	25	37726501	37995001	-0.560172	Loss	268501	97			268500	no
CLAC	25	43371901	44950501	-0.454334	Loss	1578601	712			1578600	no
CLAC	26	30284701	30559950	-0.494394	Loss	275250	72			275249	no
CLAC	28	20311201	24093301	-0.477656	Loss	3782101	1595			3782100	yes
CLAC	29	31997701	41057101	-0.453819	Loss	9059401	3694			9059400	yes
CLAC	30	15231301	16501801	-0.523132	Loss	1270501	415			1270500	no
CLAC	30	22091101	23553601	-0.534024	Loss	1462501	561			1462500	no
CLAC	32	11760601	12264001	-0.996357	Loss	503401	217			503400	no
CLAC	32	16264501	16662901	-2.87076	Loss	398401	157	16264501	19213201	2948700	no
CLAC	32	16663801	19213201	-0.499354	Loss	2549401	975
CLAC	33	23614501	23662801	-4.49526	Loss	48301	24	23614501	24097501	483000	no
CLAC	33	23809801	24097501	-3.78983	Loss	287701	135
CLAC	34	3018200	3836701	0.49485	Gain	818502	317			818501	no
CLAC	34	22640701	25561201	0.407365	Gain	2920501	1338			2920500	no
CLAC	34	28938001	30620101	0.404184	Gain	1682101	717			1682100	no
CLAC	36	3001501	4269301	-0.986385	Loss	1267801	519	3001501	18994801	15993300	yes
CLAC	36	4272001	7020301	-0.812252	Loss	2748301	1153
CLAC	36	7080601	13421101	-0.839025	Loss	6340501	2716
CLAC	36	13450201	18994801	-0.854116	Loss	5544601	2369
CLAC	36	24775801	25943701	0.856007	Gain	1167901	518	24775801	27627901	2852100	no
CLAC	36	25945801	27627901	0.59032	Gain	1682101	739
CLAC	36	29793601	33840025	-0.866652	Loss	4046425	1522			4046424	yes
CLAC	37	6055201	8191501	-0.497499	Loss	2136301	861			2136300	no
CLAC	38	5885101	8240101	-0.496665	Loss	2355001	946	5885101	14681701	8796600	yes
CLAC	38	8256001	14681701	-0.452014	Loss	6425701	2663
CLAC	38	22089601	22422901	-0.574304	Loss	333301	145			333300	no
CLAC	X	27087901	27438601	-3.19704	Loss	350701	156			350700	no
CLAC	X	81677401	81770101	-3.1805	Loss	92701	29			92700	no

## Sheet: focal CNA (<3Mb) annotat
Cell Line	Canfam2 genome coordinates (0.4 threshold gains; 0.45 losses)	Converted Canfam3 genome coordinates	Gain or Loss	Protein Coding Genes, Broad Improved Canine Annotation v1 (many is >20 protein coding genes)
BACA	chr1:104920501-105062101	chr1:101844119-101986037	gain	NLRP5	NLRP8	NLRP13	TMSB15B
BACA	chr1:19287301-19378801	chr1:16278286-16369786	gain
BACA	chr1:53679001-53728501	chr1:50635214-50684714	loss	PARK2
BACA	chr11:44257501-44333401	chr11:41,227,544-41,303,452	loss	ENSCAFG00000001675	CDKN2B	CDKN2A	CDKN2B-AS1	CFRNASEQ_PROT_00021621	CFRNASEQ_PROT_00018836
BACA	chr13:31488301-31563901	chr13:28451442-28527042	loss
BACA	chr14:5279701-5805301	chr14:2328612-2854977	gain	ENSCAFG00000001253	OR14C36	ENSCAFG00000001257	ENSCAFG00000031924	ENSCAFG00000030236	OR2T6	OR2T27	ENSCAFG00000001268	OR2T11	ENSCAFG00000031139	ENSCAFG00000031578	OR14I1	OR2G6
BACA	chr14:9771601-11306401	chr14:6819811-8349145	loss	many	ENSCAFG00000001499	UBE2H	NRF1	FAM40B	AHCYL2	ENSCAFG00000001530	SMO	TSPAN33	TNPO3	ENSCAFG00000029750	IRF5	ENSCAFG00000001616	ENSCAFG00000031387	ENSCAFG00000030107	ATP6V1F	FLNC	CCDC136	OPN1SW	CALU	FAM71F1	FAM71F2	IMPDH1	PRRT4	RBM28	LEP	SND1	LRRC4
BACA	chr17:59755413-59877611	chr17:56681685-56802559	loss	ENSCAFG00000030875	HMGCS2	ENSCAFG00000029705
BACA	chr18:21440701-21826050	chr18:18452928-18838278	loss	MAGI2
BACA	chr18:30669001-30741901	chr18:27648471-27721389	loss	CFRNASEQ_PROT_00052279	CFRNASEQ_PROT_00052280	CFRNASEQ_PROT_00052281
BACA	chr18:33244501-33279601	chr18:30224651-30259751	gain
BACA	chr19:16273201-16325701	chr19:13269329-13322085	loss	INTU
BACA	chr19:22849850-23039101	chr19:19839338-20030175	gain	MAD2L1	ENSCAFG00000024224
BACA	chr19:23048101-23328901	chr19:20039175-20319984	loss
BACA	chr19:36189601-36252301	chr19:33170190-33232890	loss
BACA	chr2:86828450-86887250	chr2:83931181-83989970	loss	VPS13D
BACA	chr20:33415501-33488701	chr20:30420581-30493781	loss
BACA	chr21:32380547-32437501	chr21:29191625-29249273	loss	ENSCAFG00000006341
BACA	chr21:48218401-49760401	chr21:45027580-46567417	loss	LUZP2
BACA	chr22:44008201-44451001	chr22:41058869-41501678	loss	ENSCAFG00000005303
BACA	chr23:23530801-23768101	chr23:20481959-20719264	loss	ENSCAFG00000032531
BACA	chr23:3500701-3681301	chr23:499455-680117	loss
BACA	chr26:21374401-22033379	chr26:18348635-19002841	loss	FICD	CMKLR1	CFRNASEQ_PROT_00095418	WSCD2	SGSM1	ENSCAFG00000030511
BACA	chr26:24809401-25859401	chr26:21778791-22829296	loss	many	TTC28	CHEK2	HSCB	CCDC117	ENSCAFG00000011954	CFRNASEQ_PROT_00095556	ZNRF3	C22orf31	KREMEN1	EMID1	RHBDD3	CFRNASEQ_PROT_00095609	ENSCAFG00000012160	GAS2L1	RASL10A	AP1B1	RPS27L	ENSCAFG00000029476	NEFH	NIPSNAP1	NF2
BACA	chr27:28717501-28914901	chr27:25695776-25891356	loss	ENSCAFG00000025589	CFRNASEQ_PROT_00102031	ENSCAFG00000016278	CFRNASEQ_PROT_00102032	ENSCAFG00000016289
BACA	chr3:56458501-56629201	chr3:53597596-53768424	loss	CRTC3	IQGAP1
BACA	chr32:41655301-41718500	chr32:38734158-38797357	loss
BACA	chr33:23694301-23898001	chr33:20653264-20856964	loss	TUSC7
BACA	chr34:41882701-42124801	chr34:38877500-39119637	loss	NAALADL2
BACA	chr36:11692801-12108601	chr36:8682929-9098729	gain	FIGN
BACA	chr36:13948801-14505001	chr36:10936146-11492797	gain	GALNT3	TTC21B	Q0Q0H5_CANFA	SCN9A	Q0Q0H3_CANFA
BACA	chr36:25714801-25912201	chr36:22688515-22885914	gain	SESTD1
BACA	chr36:7100401-7434301	chr36:4097021-4431001	gain	CCDC148	PKP4
BACA	chr38:19014301-19208701	chr38:16014662-16209062	loss	DUSP10
BACA	chr4:44200801-44312701	chr4:41001684-41113584	loss	RANBP17
BACA	chr4:81534601-81580801	chr4:78333377-78379580	gain
BACA	chr5:59579701-59637901	chr5:56578714-56636943	loss	VWA1	ENSCAFG00000019256	TMEM240	SSU72
BACA	chr5:73878601-74713801	chr5:70872613-71708016	loss	CDYL2	DYNLRB2
BACA	chr5:81156601-81463201	chr5:78149738-78456338	loss	ZFHX3
BACA	chr5:87869101-87935401	chr5:84862731-84929031	loss
BACA	chr6:46135599-46210801	chr6:43074578-43149780	gain	ENSCAFG00000023319
BACA	chr7:83234701-83416801	chr7:80182093-80364193	loss	CFRNASEQ_PROT_00166923	CFRNASEQ_PROT_00166924	CFRNASEQ_PROT_00166925	CFRNASEQ_PROT_00166926	CFRNASEQ_PROT_00166927	CFRNASEQ_PROT_00166928	CFRNASEQ_PROT_00166929	CFRNASEQ_PROT_00166930	ENSCAFG00000019080	CFRNASEQ_PROT_00166932	CFRNASEQ_PROT_00166933	CFRNASEQ_PROT_00166934	CFRNASEQ_PROT_00166935	CFRNASEQ_PROT_00166936	CFRNASEQ_PROT_00166938	CFRNASEQ_PROT_00166939	CFRNASEQ_PROT_00166940
BACA	chr7:83868301-83998201	chr7:80816144-80946078	loss	ENSCAFG00000014968
BACA	chr8:19963201-20924401	chr8:16956540-17918274	loss	RPL38	SEC23A	GEMIN2	TRAPPC6B	PNN	ENSCAFG00000013883	FBXO33
BACA	chr8:76371265-77306701	chr8:73386073-74321923	gain	ENSCAFG00000030258	ENSCAFG00000028509	ENSCAFG00000030284	ENSCAFG00000029996	ENSCAFG00000030894	ENSCAFG00000030001	ENSCAFG00000030900	ENSCAFG00000024111	ENSCAFG00000029299	ENSCAFG00000018499
BACA	chr9:10518315-10977053	chr9:7529463-7905640	loss
BACA	chr9:11750800-12045918	chr9:8677318-8967885	loss	ENSCAFG00000015160
BACA	chr9:13465201-13503301	chr9:10342306-10376726	loss	ENSCAFG00000032099
BACA	chr9:19874401-20114950	chr9:16745347-16985359	loss	ENSCAFG00000032512
BACA	chr9:20115001-20444460	chr9:16985410-17314891	loss
BACA	chr9:21001026-21507500	chr9:17962969-18191065, chr9:17335245-17407059	loss	ENSCAFG00000031375	ENSCAFG00000029973	ENSCAFG00000028735	ARHGAP27
BACA	chrUn:42079750-42106468	chrUn_AAEX03020055:14615-41333	loss	ENSCAFG00000023661
BACA	chrX:124124473-124183501	chrX:121081019-121140103	gain	ENSCAFG00000023624
BACA	chrX:73556401-73640701	chrX:70493040-70577340	loss	DIAPH2
CLAC	chr1:110892300-110918900	chr1:108006411-108033011	loss	CARD8
CLAC	chr14:20706001-21241801	chr14:17758345-18294289	gain	CYP51A1	LRRD1	KRIT1	ANKIB1	ENSCAFG00000001971	GATAD1	PEX1	RBM48	CFRNASEQ_PROT_00034724	FAM133B(human)	CFRNASEQ_PROT_00034726	CDK6	ENSCAFG00000030717
CLAC	chr14:5279701-5805301	chr14:2328612-2854977	gain	ENSCAFG00000001253	OR14C36	ENSCAFG00000001257	ENSCAFG00000031924	ENSCAFG00000030236	OR2T6	OR2T27	ENSCAFG00000001268	OR2T11	ENSCAFG00000031139	ENSCAFG00000031578	OR14I1	OR2G6
CLAC	chr16:39858001-42642901	chr16:36900868-39685008	loss	RHG07_CANFA	CFRNASEQ_PROT_00045078	C8orf48	SGCZ	TUSC3	MSR1
CLAC	chr17:17163301-19106101	chr17:14188176-16125834	gain	OSR1	TTC32	MATN3	LAPTM4A	SDC1	PUM2	ENSCAFG00000031171	ENSCAFG00000003845	RHOB	HS1BP3	GDF7	C2orf43	APOB	ENSCAFG00000030832
CLAC	chr19:35319601-37753801	chr19:32300180-34734728	loss	ENSCAFG00000029279	DPP10	CFRNASEQ_PROT_00058916	CFRNASEQ_PROT_00058970	CFRNASEQ_PROT_00059069	CFRNASEQ_PROT_00059176
CLAC	chr19:46974901-48399001	chr19:43957928-45377779	loss	LRP1B(human)	ENSCAFG00000024630	CFRNASEQ_PROT_00059550	ENSCAFG00000030677	KYNU	ARHGAP15
CLAC	chr2:26046750-26072101	chr2:23208742-23234093	loss	ENSCAFG00000023349	CFRNASEQ_PROT_00060649	CFRNASEQ_PROT_00060650	CFRNASEQ_PROT_00060651
CLAC	chr2:86820300-86903500	chr2:83923031-84006221	gain	VPS13D
CLAC	chr21:30147001-30326101	chr21:27102269-27199439, chr21:27168028-27191016	loss	OR51F1	ENSCAFG00000028889	ENSCAFG00000029863	ENSCAFG00000032229
CLAC	chr22:46206301-46386901	chr22:43257947-43438652	loss
CLAC	chr23:23556301-27336301	chr23:20507464-24283950	gain	ENSCAFG00000032531	ZNF385D(human)	ZNF385D	ENSCAFG00000030688	SGOL1	KAT2B	PP2D1	RAB5A_CANFA	EFHB	ENSCAFG00000005822	KCNH8	ENSCAFG00000005831
CLAC	chr25:18524401-19240501	chr25:15538420-16254571	loss
CLAC	chr25:37726501-37995001	chr25:34737302-35005812	loss	PPP3CC	SLC39A14	PIWIL2	POLR3D
CLAC	chr25:43371901-44950501	chr25:40372476-41952094	loss	ENSCAFG00000031160	SLC19A3	ENSCAFG00000031071	CCL20	WDR69	SPHKAP	PID1	CFRNASEQ_PROT_00093903	DNER	ENSCAFG00000010553	ENSCAFG00000010555
CLAC	chr26:30284701-30559950	chr26:27217609-27494927	loss	ENSCAFG00000032328	ENSCAFG00000031196	ENSCAFG00000031786	ENSCAFG00000015176	ENSCAFG00000031273	ENSCAFG00000014432
CLAC	chr3:34555501-34639501	chr3:31712018-31796270	loss	OCA2(human)	HERC2
CLAC	chr3:7984501-10551301	chr3:5101319-7670055	loss	ENSCAFG00000007469
CLAC	chr30:15231301-16501801	chr30:12239973-13511155	loss
CLAC	chr30:22091101-23553601	chr30:19100809-20563289	loss	WDR72	UNC13C
CLAC	chr32:11760601-12264001	chr32:8799111-9302577	loss	ARHGAP24
CLAC	chr32:16264501-19213201	chr32:13305478-16247556	loss	FAM190A	CFRNASEQ_PROT_00123107	ENSCAFG00000009954	ENSCAFG00000009965	CFRNASEQ_PROT_00123176	CFRNASEQ_PROT_00123233	ENSCAFG00000028979	ENSCAFG00000024643
CLAC	chr33:23614501-24097501	chr33:20573464-21056464	loss	TUSC7
CLAC	chr34:22640701-25561201	chr34:19632326-22550924	gain	many	RPL39L(human)	ENSCAFG00000013704	MASP1	RTP4	SMS_CANFA	BCL6	CFRNASEQ_PROT_00130298	CFRNASEQ_PROT_00128760	AC022498.1(human)	LPP	TPRG1(human)	ENSCAFG00000013927	TPRG1	TP63	LEPREL1	CLDN1	CLDN16	TMEM207	IL1RAP	CFRNASEQ_PROT_00128843	CFRNASEQ_PROT_00128846
CLAC	chr34:28938001-30620101	chr34:25928856-27611212	gain	many	IQCJ-SCHIP1	IL12A	ENSCAFG00000031848	ENSCAFG00000029841	ENSCAFG00000029447	C3orf80	IFT80	SMC4	TRIM59	CFRNASEQ_PROT_00130516	KPNA4	ARL14	ENSCAFG00000014321	PPM1L	B3GALNT1	ENSCAFG00000030715	NMD3	SPTSSB	OTOL1	ENSCAFG00000029938
CLAC	chr34:3018200-3836701	chr34:18300-830407	gain	CTSC	FAM105B	FAM105A	TRIO	CFRNASEQ_PROT_00129715	DNAH5
CLAC	chr36:24775801-27627901	chr36:21748781-24598605	gain	RBM45	OSBPL6	DFNB59	PRKRA	FKBP7	PLEKHA3	ENSCAFG00000014025	ENSCAFG00000028776	CCDC141	SESTD1	ZNF385B	CWC22	UBE2E3
CLAC	chr37:6055201-8191501	chr37:3055229-5191556	loss
CLAC	chr38:22089601-22422901	chr38:19089989-19423289	loss
CLAC	chr4:21113401-21408301	chr4:17906848-18201748	loss	ENSCAFG00000013221	ENSCAFG00000013264
CLAC	chr5:81193501-81405601	chr5:78186638-78398738	gain
CLAC	chr6:41845501-43500601	chr6:38804119-40439497	gain	many	TRAF7	RAB26	PKD1	TSC2	NTHL1	SLC9A3R2	ENSCAFG00000032381	ENSCAFG00000029888	ZNF598	ENSCAFG00000031645	GFER	NOXO1	TBL3	ENSCAFG00000019472	RNF151	NDUFB10	CFRNASEQ_PROT_00157785	RPL3L(human)	CFRNASEQ_PROT_00157787	CFRNASEQ_PROT_00157788	CFRNASEQ_PROT_00157789	CFRNASEQ_PROT_00157790	SEPX1(human)	HS3ST6	MEIOB	ENSCAFG00000030458	CFRNASEQ_PROT_00157811	CFRNASEQ_PROT_00157812	NUBP2	IGFALS	ENSCAFG00000019495	CFRNASEQ_PROT_00162285	MRPS34	MAPK8IP3	NME3	HN1L	CRAMP1L	ENSCAFG00000019542	TMEM204	TELO2	ENSCAFG00000029361	ENSCAFG00000031348	CLCN7	C16orf91	UNKL
CLAC	chr6:46120501-46210801	chr6:43059480-43149780	gain	ENSCAFG00000023319
CLAC	chr7:83868301-83998201	chr7:80816144-80946078	loss	ENSCAFG00000014968
CLAC	chr9:13463401-13502000	chr9:10342306-10375425	gain	ENSCAFG00000032099
CLAC	chr9:20114950-20448301	chr9:16985359-17318732	loss
CLAC	chr9:21016201-21567001	chr9:17962969-18250979 (30.3% of bases, 52.1% of span); chr2:83990637-84138615 (26.7% of bases, 27.0% of span); chr9:17376942-17416431 (7.0% of bases, 7.2% of span); chr9:17335245-17382036 (8.5% of bases, 8.5% of span)	gain	ENSCAFG00000031375	ENSCAFG00000029973	ENSCAFG00000028735	ARHGAP27	VPS13D	TNFRSF1B	ENSCAFG00000031850	ENSCAFG00000031337	ENSCAFG00000031850
CLAC	chrX:27087901-27438601	chrX:27132767-27483662	loss	DMD
CLAC	chrX:81677401-81770101	chrX:78609505-78702252	loss	IL1RAPL2	ENSCAFG00000017850
[truncated: 55 more columns]

## Sheet: large CNA annotat 
Cell Line	Canfam2 genome coordinates (0.4 threshold gains; 0.45 losses)	Converted Canfam3 genome coordinates	Gain or Loss	Protein Coding Genes, Broad Improved Canine Annotation v1 (many is >20 protein coding genes)
BACA	chr11:3004650-44014201	chr11:4,750-40,984,233	gain	many	MGAT1	CFRNASEQ_PROT_00020003	ZNF197	HSPE1	BTNL9	ENSCAFG00000028826	OR2V1	TRIM7	TRIM41	GNB2L1	TRIM52	ENSCAFG00000028829	ENSCAFG00000012657	ENSCAFG00000000502	ENSCAFG00000028671	ENSCAFG00000000497	ENSCAFG00000000494	ENSCAFG00000000491	ENSCAFG00000030653	ENSCAFG00000018149	FLT4	ENSCAFG00000030378	CNOT6	GFPT2	CFRNASEQ_PROT_00017424	MAPK9	RASGEF1C	RNF130	TBC1D9B	CTC-241N9.1(human)	C5orf45	SQSTM1	SQSTM1(human)	CFRNASEQ_PROT_00020126	CFRNASEQ_PROT_00020127	MGAT4B	LTC4S	MAML1	CANX	CBY3	ENSCAFG00000000336	RUFY1	ENSCAFG00000032181	ADAMTS2	ZNF354C
BACA	chr11:44505301-54318601	chr11:41,475,425-51,288,893	gain	many	DMRTA1	ELAVL2	ENSCAFG00000014096	IZUMO3	ENSCAFG00000007543	TUSC1	CAAP1	PLAA	IFT74	LRRC19	TEK	ENSCAFG00000001714	ENSCAFG00000029839	C9orf11	MOB3B	IFNK	C9orf72	LINGO2	ENSCAFG00000001734	ACO1	TOPORS	CFRNASEQ_PROT_00021898	CFRNASEQ_PROT_00021899	NDUFB6(human)	CFRNASEQ_PROT_00021904	TMEM215	APTX	LOC474739	SMU1	CFRNASEQ_PROT_00021936	B4GALT1	BAG1	SPINK4	CHMP5	AQP7	NFX1	AQP3	NOL6	UBE2R2	ENSCAFG00000025156	UBAP2	DCAF12	UBAP1	KIF24	NUDT2
BACA	chr11:54320701-77414701	chr11:51,290,993-74,387,340	loss	many	DCTN3	SIGMAR1	GALT	ENSCAFG00000001951	CCL27	CCL19	CCL21	CFRNASEQ_PROT_00022032	CFRNASEQ_PROT_00022033	KIAA1045	ENSCAFG00000028944	ENSCAFG00000020055	ENSCAFG00000030957	ENSCAFG00000025056	DNAJB5	C9orf131	VCP	PIGO	FAM214B	CFRNASEQ_PROT_00022087	UNC13B	ENSCAFG00000002045	ENSCAFG00000018740	RUSC2	FAM166B	CFRNASEQ_PROT_00019108	CFRNASEQ_PROT_00019109	TESK1	CD72	SIT1	CCDC107	C11H9orf100	CA9	TPM2	TLN1	CREB3	GBA2	RGP1	MSMP	NPR2	SPAG8	HINT2	CFRNASEQ_PROT_00019151	FAM221B	TMEM8B
BACA	chr13:3031050-31485301	chr13:31080-28448442	gain	many	LAPTM4B	MATN2	ENSCAFG00000031952	C8orf47	ENSCAFG00000030250	POP1	NIPAL2	CFRNASEQ_PROT_00030286	KCNS2	STK3	OSR2	VPS13B	CFRNASEQ_PROT_00030306	CFRNASEQ_PROT_00030308	COX6C(human)	RGS22	ENSCAFG00000000532	FBXO43	CFRNASEQ_PROT_00028561	CFRNASEQ_PROT_00028562	POLR2K(human)	ENSCAFG00000000548	RNF19A	CFRNASEQ_PROT_00030349	RNF19A(human)	ANKRD46	SNX31	PABPC1	YWHAZ	CFRNASEQ_PROT_00030390	ZNF706	GRHL2	NCALD	CFRNASEQ_PROT_00030422	ENSCAFG00000025578	RRM2B	UBR5	ENSCAFG00000030010	ENSCAFG00000000634	ODF1	KLF10	AZIN1	KB-1507C5.2(human)	ATP6V1C1	BAALC
BACA	chr13:31565701-66180001	chr13:28528842-63239453	gain	many	EFR3A	ENSCAFG00000001102	HHLA1	KCNQ3	CFRNASEQ_PROT_00031123	LRRC6	TMEM71	PHF20L1	TG	SLA	WISP1	NDRG1	ST3GAL1	ST3GAL1(human)	ENSCAFG00000029450	ZFAT	ENSCAFG00000031399	KHDRBS3	ENSCAFG00000001168	ENSCAFG00000029044	FAM135B	CFRNASEQ_PROT_00031234	FAM135B(human)	COL22A1	KCNK9	TRAPPC9	CHRAC1	EIF2C2	PTK2	CFRNASEQ_PROT_00031313	CFRNASEQ_PROT_00031318	DENND3	SLC45A4	ENSCAFG00000029505	GPR20	PTP4A3	ENSCAFG00000001250	ENSCAFG00000031926	TSNARE1	BAI1	ENSCAFG00000001272	ARC(human)	PSCA	THEM6	SLURP1
BACA	chr14:11308501-17394601	chr14:8351245-14445121	loss	many	SND1	ARF5	PAX4	GCC1	ZNF800	GRM8	ENSCAFG00000001744	ENSCAFG00000001747	POT1	GPR37	ENSCAFG00000001759	LSM3	TMEM229A	SPAM1	HYAL4	ENSCAFG00000024436	WASL	LMOD2	ASB15	CFRNASEQ_PROT_00035969	ENSCAFG00000025112	GRM3	KIAA1324L	DMTF1	C7orf23	C7orf23(human)	CROT	ABCB4	Q4PLA8_CANFA	RUNDC3B	SLC25A40	DBF4	ADAM22	SRI	STEAP4
BACA	chr16:3374401-62519632	chr16:384066-59584533	loss	many	ENSCAFG00000012301	IGFBP3	IGFBP1	ADCY1	ENSCAFG00000029006	ENSCAFG00000029647	CFRNASEQ_PROT_00041191	TRIM24(human)	PDIA4	EZH2	CUL1	ENSCAFG00000003479	ENSCAFG00000029696	CNTNAP2(human)	TPK1	ENSCAFG00000003493	SNRPN	NOBOX	ARHGEF5	ENSCAFG00000030963	ENSCAFG00000032026	ENSCAFG00000030583	OR2A2	OR2A14	OR2A12	OR2A25	OR2A5	OR6B1	ENSCAFG00000029411	OLF3_CANFA	ENSCAFG00000029291	FAM115A	FAM115C	TAS2R41	ENSCAFG00000003537	TAS2R16	EPHA1	ZYX	FAM131B	TMEM139	ENSCAFG00000029004	TAS2R40	TAS2R39	PIP	ENSCAFG00000003650
BACA	chr18:53121601-58854100	chr18:50095518-55826631	gain	many	POLD4	ANKRD13D	ADRBK1	KDM2A	RHOD	CFRNASEQ_PROT_00056156	CFRNASEQ_PROT_00056157	CFRNASEQ_PROT_00056158	CFRNASEQ_PROT_00056159	C11orf86	PC	C11orf80	SPTBN2	RBM4B	RBM14	Q6PXD7_CANFA	CCDC87	CTSF	ENSCAFG00000012504	ZDHHC24	ENSCAFG00000012580	PELI3	CFRNASEQ_PROT_00053479	MRPL11	NPAS4	SLC29A2	B3GNT1	BRMS1	RIN1	CD248	TMEM151A	YIF1A	CNIH2	ENSCAFG00000012855	KLC2	PACS1	SF3B2	GAL3ST3	CATSPER1	BANF1	EIF1AD	SART1	ENSCAFG00000013124	ENSCAFG00000028476	C11orf68
BACA	chr2:3000001-58056601	chr2:101-55184068	loss	many	ENSCAFG00000003666	ENSCAFG00000003668	ENSCAFG00000028469	ENSCAFG00000029576	FZD8	ENSCAFG00000023176	CCNY	CREM_CANFA	CUL2	ENSCAFG00000029571	PARD3	ENSCAFG00000003753	NRP1	ITGB1	CFRNASEQ_PROT_00059930	CCDC7	ENSCAFG00000007550	ENSCAFG00000029328	ENSCAFG00000024834	ENSCAFG00000023478	ENSCAFG00000023337	ENSCAFG00000023202	ENSCAFG00000024687	ANKRD62	ENSCAFG00000032223	ENSCAFG00000003859	RAB18	ENSCAFG00000013789	KATNB1	ENSCAFG00000014021	ENSCAFG00000030789	ANKRD26(human)	ENSCAFG00000023313	YME1L1	GWL_CANFA	ACBD5	ABI1	ENSCAFG00000004370	PDSS1	ENSCAFG00000031840	APBB1IP	GAD2	MYO3A	GPR158	THNSL1
BACA	chr26:27736801-40824901	chr26:24707344-37756223	gain	many	DEPDC5	YWHAH	Q5U9D0_CANFA	SLC5A4	ENSCAFG00000031415	ENSCAFG00000029323	ENSCAFG00000030555	ENSCAFG00000023843	ENSCAFG00000024720	ENSCAFG00000029878	ENSCAFG00000032195	ENSCAFG00000029939	ENSCAFG00000030935	ENSCAFG00000031403	ENSCAFG00000029243	ENSCAFG00000030735	ENSCAFG00000030602	ENSCAFG00000032078	ENSCAFG00000031637	ENSCAFG00000031927	ENSCAFG00000032249	ENSCAFG00000032325	ENSCAFG00000029746	ENSCAFG00000029467	ENSCAFG00000029435	ENSCAFG00000023160	ENSCAFG00000032232	IGLV11-55	ENSCAFG00000013551	ENSCAFG00000029236	ENSCAFG00000031653	ENSCAFG00000023920	ENSCAFG00000032706	ENSCAFG00000013587	ZNF280B	PRAME	ENSCAFG00000013622	ENSCAFG00000032328	ENSCAFG00000031196	ENSCAFG00000031786	ENSCAFG00000015176	ENSCAFG00000031273	ENSCAFG00000014432	ENSCAFG00000031733	ENSCAFG00000029493
BACA	chr38:21271501-26462401	chr38:18271880-23449493	loss	many	CFRNASEQ_PROT_00139207	PBX1	NUF2	RGS5	RGS4	C1orf110	HSD17B7	DDR2	UAP1	UHMK1	SH2D1B	ENSCAFG00000013086	C1orf111	OLFML2B	ATF6	DUSP12	FCRLB	FCRLA	ENSCAFG00000013035	ENSCAFG00000013015	SDHC	C1orf192	MPZ	PCP4L1	B6E443_CANFA	TOMM40L	NDUFS2	ADAMTS4	B4GALT3	USP21	UFC1	DEDD	NIT1	PFDN2	KLHDC9	PVRL4	ARHGAP30	F11R	CFRNASEQ_PROT_00138427	CFRNASEQ_PROT_00138428	CD244	LY9	SLAMF7	CD48	SLAF1_CANFA
BACA	chrUn:61669-9766980	chrUn_JH373233:61669-2660953 (26.2% of bases, 26.8% of span); chrUn_JH373234:1-1881673 (17.4% of bases, 19.4% of span); chrUn_JH373235:1-1415205 (13.4% of bases, 14.6% of span); chrUn_JH373236:1-1067467 (9.5% of bases, 11.0% of span); chrUn_JH373237:1-866315 (8.9% of bases, 8.9% of span); chrUn_JH373238:1-881102 (8.5% of bases, 9.1% of span); chrUn_JH373239:1-822601 (8.2% of bases, 8.5% of span);…	gain	none
BACA	chrX:3001-6600301	chrX:3001-6645013	loss	many	ENSCAFG00000031744	ENSCAFG00000029674	ENSCAFG00000010945	ENSCAFG00000028761	GTPBP6	PLCXD1	SHOX	CRLF2	CSF2RA	ENSCAFG00000031295	IL3RA	SLC25A6	ENSCAFG00000032218	ENSCAFG00000029091	ASMT	ENSCAFG00000030459	ENSCAFG00000028620	ASMTL	ENSCAFG00000029462	ENSCAFG00000030381	SLC25A6(human)	DHRSX	ENSCAFG00000028845	CD99	XG	GYG2	ARSD	ARSH	Q32KI0_CANFA	MXRA5	ENSCAFG00000032309	PRKX	ENSCAFG00000011192	ENSCAFG00000031750	ENSCAFG00000032113	OBP	ENSCAFG00000011251	ENSCAFG00000029931	HDHD1	ENSCAFG00000030093	STS	CFRNASEQ_PROT_00187119	ENSCAFG00000004314	PNPLA4	KAL1
CLAC	chr11:44123101-52896901	chr11:41,093,133-49,868,421	loss	many	ENSCAFG00000001671	ENSCAFG00000001675	CDKN2B	CFRNASEQ_PROT_00021621	CFRNASEQ_PROT_00018836	DMRTA1	ELAVL2	ENSCAFG00000014096	IZUMO3	ENSCAFG00000007543	TUSC1	PLAA	IFT74	LRRC19	IFT74	TEK	ENSCAFG00000001714	ENSCAFG00000029839	C9orf11	MOB3B	IFNK	C9orf72	LINGO2	ENSCAFG00000001734	ACO1	TOPORS	CFRNASEQ_PROT_00021898	CFRNASEQ_PROT_00021899	NDUFB6 (human)	CFRNASEQ_PROT_00021904	GNE	RNF38
CLAC	chr11:60056701-63065101	chr11:57,026,902-60,036,514	loss	ENSCAFG00000002542	INVS_CANFA	TEX10	ENSCAFG00000002577	ENSCAFG00000002586	ENSCAFG00000002590	BAAT	MRPL50	ZNF189	ALDOB	TMEM246	RNF20	GRIN3A	CYLC2	CFRNASEQ_PROT_00019452	ENSCAFG00000030806
CLAC	chr13:3031050-66180001	chr13:31080-63239453	gain	many	LAPTM4B	MATN2	ENSCAFG00000031952	C8orf47	ENSCAFG00000030250	POP1	NIPAL2	CFRNASEQ_PROT_00030286	KCNS2	STK3	OSR2	VPS13B	CFRNASEQ_PROT_00030306	CFRNASEQ_PROT_00030308	COX6C(human)	RGS22	ENSCAFG00000000532	FBXO43	CFRNASEQ_PROT_00028561	CFRNASEQ_PROT_00028562	POLR2K(human)	ENSCAFG00000000548	RNF19A	CFRNASEQ_PROT_00030349	RNF19A(human)	ANKRD46	SNX31	PABPC1	YWHAZ	CFRNASEQ_PROT_00030390	ZNF706	GRHL2	NCALD	CFRNASEQ_PROT_00030422	ENSCAFG00000025578	RRM2B	UBR5	ENSCAFG00000030010	ENSCAFG00000000634	ODF1	KLF10	AZIN1	KB-1507C5.2(human)	ATP6V1C1	BAALC
CLAC	chr15:28950601-32868001	chr15:25944266-29854950	loss	SLC6A15	TSPAN19	CFRNASEQ_PROT_00039890	LRRIQ1	ALX1	RASSF9	NEUT_CANFA	MGAT4C	CFRNASEQ_PROT_00039976	C12orf50	C12orf29	CEP290	TMTC3	ENSCAFG00000029427	SCF_CANFA
CLAC	chr15:59781601-63343201	chr15:56761915-60325522	loss	FSTL5	NAF1	CFRNASEQ_PROT_00040927	NPY1R_CANFA	NPY5R	TMA16	March1
CLAC	chr16:31178701-35927101	chr16:28225946-32973923	loss	ENSCAFG00000023937	KCNU1	UNC5D	CFRNASEQ_PROT_00044628	CFRNASEQ_PROT_00044629	DUSP26	RNF122	TTI2	MAK16	FUT10	ENSCAFG00000006342	NRG1
CLAC	chr16:4212250-7917301	chr16:1233059-4936371	loss	ENSCAFG00000029647	CFRNASEQ_PROT_00041191	TRIM24(human)	PDIA4	EZH2	CUL1	ENSCAFG00000003479	ENSCAFG00000029696	CNTNAP2(human)
CLAC	chr16:50503250-54916801	chr16:47541355-51957350	loss	ODZ3	CFRNASEQ_PROT_00045485	ENSCAFG00000031456	DNMT1
CLAC	chr17:20683201-26348701	chr17:17701251-23246015	gain	many	KLHL29	ATAD2B	ENSCAFG00000031376	ENSCAFG00000029762	MFSD2B	C2orf44	ENSCAFG00000003950	FKBP1B	TP53I3	PFN4	ENSCAFG00000030215	ITSN2	E0A8T3_CANFA	CFRNASEQ_PROT_00046524	CFRNASEQ_PROT_00046546	PTRHD1	CENPO	ADCY3	DNAJC27	EFR3B	POMC	DNMT3A	CFRNASEQ_PROT_00049367	DTNB	ENSCAFG00000004240	ASXL2	KIF3C	RAB10	FAM59B	HADHA	ENSCAFG00000029395	GPR113	EPT1	CCDC164	OTOF	C2orf70	CIB4	KCNK3	CENPA	DPYSL5	MAPRE3	TMEM214	C2orf53	AGBL5	EMILIN1
CLAC	chr17:3001900-12079501	chr17:26167-9107317	gain	many	FAM110C	SH3YL1	CFRNASEQ_PROT_00045905	ACP1	CFRNASEQ_PROT_00048731	CFRNASEQ_PROT_00048732	FAM150B(human)	ENSCAFG00000003206	AC092159.3(human)	CFRNASEQ_PROT_00048750	SNTG2	TPO	PXDN	MYT1L	TSSC1	TRAPPC12	ENSCAFG00000031218	RNASEH1	RPS7	COLEC11	ALLC	DCDC2C	SOX11	AC010729.1(human)	CMPK2	RSAD2(human)	RSAD2	RNF144A	CFRNASEQ_PROT_00046033	CFRNASEQ_PROT_00046057	ID2(human)	KIDINS220	MBOAT2	ASAP2	ITGB1BP1	CPSF3	IAH1	Q56JJ1_CANFA	ENSCAFG00000003386	TAF1B	GRHL1	KLF11	CYS1(human)	CFRNASEQ_PROT_00048993	CFRNASEQ_PROT_00046106
CLAC	chr17:36582001-43527301	chr17:33474524-40463840	gain	many	AC013480.1(human)	PKDCC	EML4	COX7A2L	CFRNASEQ_PROT_00049918	KCNG3	MTA3	ARID5A	ENSCAFG00000006550	ITPRIPL1	NCAPH	CFRNASEQ_PROT_00047213	SNRNP200(human)	CIAO1	TMEM127	STARD7	DUSP2	CFRNASEQ_PROT_00047230	ASTL(human)	ADRA2B	GPAT2	ENSCAFG00000006862	KCNIP3	PROM2	ENSCAFG00000030667	ZNF2	CFRNASEQ_PROT_00047240	ZNF514	MRPS5	MAL	MALL	NPHP1	TPC3	BUB1	ACOXL	ENSCAFG00000001564	BCL2L11	ENSCAFG00000023277	ANAPC1	MERTK	TMEM87B	FBLN7	ZC3H8	ZC3H6	ENSCAFG00000031118
CLAC	chr17:51269701-59758013	chr17:48200132-56684285	gain	many	NRAS	POLE4	HK2	SEMA4F	C2orf65	DOK1	LOXL3	Q45FF7_CANFA	DQX1	TLX2	LBX2	TTC31	MOGS	WBP1	RTKN	WDR54	DHRS13	DCTN1	SLC4A5	MTHFD2	MOB1A	BOLA3	TET3	DGUOK	ACTG2	CFRNASEQ_PROT_00050551	CFRNASEQ_PROT_00050553	CFRNASEQ_PROT_00050554	ENSCAFG00000028649	C2orf78	DUSP11	TPRKB	NAT8	ALMS1	ENSCAFG00000008835	EGR4	FBXO41	ENSCAFG00000008879	CFRNASEQ_PROT_00050598	PRADC1	SMYD5	NOTO	RAB11FIP5	SFXN5	EMX1
CLAC	chr17:59863711-67222850	chr17:56788643-64143250	gain	many	ENSCAFG00000030875	ENSCAFG00000010128	NOTCH2	ENSCAFG00000010738	PDE4DIP	ENSCAFG00000028490	ENSCAFG00000010847	ENSCAFG00000028699	ENSCAFG00000028820	ENSCAFG00000023683	ENSCAFG00000023838	PRKAB2	CFRNASEQ_PROT_00050959	FMO5	CHD1L	ENSCAFG00000011043	BCL9	ACP6	CXA5_CANFA	GJA8	ENSCAFG00000011110	ENSCAFG00000028546	CD160	RNF115	ENSCAFG00000024445	POLR3C	NUDT17	PIAS3	ANKRD35	LIX1L	GNRHR2(human)	ANKRD34A	POLR3GL	TXNIP	HFE2	ENSCAFG00000023625	ENSCAFG00000029779	ENSCAFG00000002465	FCGR1A	ENSCAFG00000029877	HIST1H4C	ENSCAFG00000029399	ENSCAFG00000031760	HIST2H2AA4	SV2A
CLAC	chr18:51416401-56832001	chr18:48390461-53805139	gain	many	FGF4	FGF19	ORAOV1	CCND1	TPCN2	MTL5	MRGPRF	IGHMBP2	MRPL21	CPT1A	ENSCAFG00000010770	GALA_CANFA	PPP6R3	ENSCAFG00000029209	C7FDX9_CANFA	C11orf24	SUV420H1	CHKA	TCIRG1	NDUFS8	ENSCAFG00000011171	ENSCAFG00000011210	ALDH3B2	TBX10	ENSCAFG00000011297	NDUFV1	ENSCAFG00000030866	GSTP1	CABP2	CDK2AP2	PITPNM1	AIP	TMEM134	CABP4	GPR152	PPP1CA	RPS6KB2	TBC1D10C	RAD9A	CLCF1	POLD4	ANKRD13D	ADRBK1	KDM2A	RHOD
CLAC	chr19:27165901-30777601	chr19:24147742-27758568	loss	ENSCAFG00000004632	ENSCAFG00000004640	ENSCAFG00000004650	CNTP5_CANFA
CLAC	chr19:7018201-14725801	chr19:4017431-11722433	loss	SLC7A11	PCDH18	ENSCAFG00000030512	ENSCAFG00000028734	ENO1	PCDH10	ENSCAFG00000003796
CLAC	chr20:17440501-21663001	chr20:14438775-18659743	loss	CNTN4	CNTN6	CHL1	ENSCAFG00000024304	ENSCAFG00000006312	PGK1	ENSCAFG00000006327	CNTN3	CFRNASEQ_PROT_00068270	PDZRN3
CLAC	chr20:30799201-34656301	chr20:27804067-31662044	loss	SYNPR	CADPS	FEZF2	C3orf14	PTPRG	ENSCAFG00000007181	ENSCAFG00000007791	U6	FHIT
CLAC	chr21:10694701-15305101	chr21:7696245-12306924	loss	FAT3	RPS24	ENSCAFG00000004270	ENSCAFG00000025134	ENSCAFG00000004288	CHORDC1	NAALAD2	ENSCAFG00000004330	ENSCAFG00000024962	ENSCAFG00000024959	ENSCAFG00000004356	FOLH1	NOX4	TYR	GRM5	ENSCAFG00000004384	RAB38
CLAC	chr21:16804201-22467901	chr21:13805722-19463913	loss	TMEM126B	CFRNASEQ_PROT_00074954	CFRNASEQ_PROT_00074958	CFRNASEQ_PROT_00074960	CFRNASEQ_PROT_00074961	CFRNASEQ_PROT_00074966	CFRNASEQ_PROT_00075029	DLG2	CFRNASEQ_PROT_00075077	CCDC90B	ENSCAFG00000032623	PCF11	RAB30	C11orf82	PRCP	ENSCAFG00000014107	FAM181B
CLAC	chr21:3031450-7619401	chr21:31550-4623692	loss	ENSCAFG00000003974	PGR	CFRNASEQ_PROT_00074669	ARHGAP42	CNTN5
CLAC	chr21:45920701-49768801	chr21:42730236-46575817	loss	NELL1	ANO5	SLC17A6	FANCF	GAS2	SVIP	LOC476890	UBE2D3	LUZP2
CLAC	chr23:23749801-27336301	chr23:20,700,964-24,283,950	loss	ZNF385D	ENSCAFG00000030688	SGOL1	KAT2B	PP2D1	RAB5A_CANFA	EFHB	ENSCAFG00000005822	KCNH8	ENSCAFG00000005831
CLAC	chr25:23661001-28982401	chr25:20679664-25996677	loss	many	MFAP3L	AADAT	ENSCAFG00000029275	ENSCAFG00000007743	CFRNASEQ_PROT_00090974	GALNTL6(human)	CFRNASEQ_PROT_00090976	ENSCAFG00000007798	CFRNASEQ_PROT_00091111	GALNTL6	ENSCAFG00000007840	HMGB2	CFRNASEQ_PROT_00091145	SAP30	SCRG1	HAND2	FBXO8	CFRNASEQ_PROT_00093282	CEP44	HPGD	GLRA3	ADAM29	DEFB131	DEFB134(human)	DEFB136
CLAC	chr28:20311201-24093301	chr28:17308238-21092204	loss	SORCS3	ENSCAFG00000024653	SORCS1
CLAC	chr29:31997701-41057101	chr29:28993710-38073129	loss	many	CFRNASEQ_PROT_00107397	CFRNASEQ_PROT_00107450	ENSCAFG00000025329	ENSCAFG00000008570	SLC7A13	LRRCC1	E2F5	CA13	CA1	CA3	CA2	PSKH2	CFRNASEQ_PROT_00108672	CFRNASEQ_PROT_00108673	ATP6V0D2	CFRNASEQ_PROT_00108675	CFRNASEQ_PROT_00108676	CFRNASEQ_PROT_00107565	WWP1	FAM82B	CPNE3	CNGB3	CNBD1	ENSCAFG00000030436	ENSCAFG00000008935	MMP16	ENSCAFG00000029124	ENSCAFG00000008955	RIPK2	OSGIN2	ENSCAFG00000008992	ENSCAFG00000032543	DECR1	CALB1	TMEM64	NECAB1	TMEM55A	OTUD6B	LRRC69	SLC26A7	RUNX1T1	CFRNASEQ_PROT_00108786	CFRNASEQ_PROT_00108787	CFRNASEQ_PROT_00108788	CFRNASEQ_PROT_00108789
CLAC	chr3:22081501-26813701	chr3:19197353-23930710	loss	MEF2C	TMEM161B	CCNH	RASA1	EDIL3
CLAC	chr3:77803201-86260801	chr3:74978202-83439479	loss	DTHD1	ARAP2	ENSCAFG00000016329	PCDH7	ENSCAFG00000029510
CLAC	chr36:29793601-33840025	chr36:26765419-30810664	loss	STK19	ZNF804A	FSIP2	ZC3H15	ITGAV	FAM171B	ZSWIM2	CALCRL	CFRNASEQ_PROT_00135276	Q28874_CANFA	GULP1	E5G724_CANFA	COL5A2
CLAC	chr36:3001501-18994801	chr36:1601-15974269	loss	many	ENSCAFG00000029958	RPRM(human)	MINOS1	GALNT13	ENSCAFG00000009172	KCNJ3	ENSCAFG00000009188	ENSCAFG00000029956	NR4A2	GPD2	ENSCAFG00000009250	GALNT5	ERMN	CYTIP	ACVR1C	ACVR1	CFRNASEQ_PROT_00134289	CFRNASEQ_PROT_00134292	UPP2(human)	CFRNASEQ_PROT_00133272	CCDC148	CFRNASEQ_PROT_00133273	PKP4	DAPL1	CFRNASEQ_PROT_00133324	TANC1	WDSUB1	BAZ2B	2015-03-07	A8WH73_CANFA	ENSCAFG00000023972	PLA2R1	ITGB6	CFRNASEQ_PROT_00134401	RBMS1	CFRNASEQ_PROT_00134439	TANK	CFRNASEQ_PROT_00133408	CFRNASEQ_PROT_00133409	CFRNASEQ_PROT_00133419	PSMD14	TBR1	SLC4A10	DPP4	GCG
CLAC	chr38:5885101-14681701	chr38:2885255-11682002	loss	many	ENSCAFG00000010290	CFRNASEQ_PROT_00137992	CFRNASEQ_PROT_00138004	CFRNASEQ_PROT_00138005	CFRNASEQ_PROT_00138007	KCNT2	ENSCAFG00000010472	A2SXS7_CANFA	B3GALT2	GLRX2	TROVE2	UCHL5	RGS2	RGS13	RGS1	RGS21	RGS18	FAM5C	ENSCAFG00000028763	ENSCAFG00000002103	ENSCAFG00000029859	KCTD3	USH2A
CLAC	chr8:3030953-77306701	chr8:31062-74321923	gain	many	ZNF496	ENSCAFG00000032126	NLRP3	ENSCAFG00000010708	OR2B11	ENSCAFG00000010776	GCSAML	ENSCAFG00000010792	OR6C4	ENSCAFG00000010800	OR4L1	CATSPERB	TC2N	FBLN5	TRIP11	ENSCAFG00000010893	CPSF2	SLC24A4	CFRNASEQ_PROT_00170300	RIN3	LGMN	GOLGA5	CHGA	ITPK1	ENSCAFG00000029069	ENSCAFG00000014977	ENSCAFG00000014973	ENSCAFG00000024337	ENSCAFG00000028548	ENSCAFG00000031023	ENSCAFG00000011090	ENSCAFG00000011092	TRAV21	AE000660.6(human)	TRAV24	TRAV29DV5	TRDV1	TRAV26-2	TRAV34	ENSCAFG00000025180	ENSCAFG00000029747	ENSCAFG00000029024	TRDV2	TRDC	TRDV3
[truncated: 644 more columns]

## Sheet: bacaLgCnaGainLossAnnotat
Cell Line	Canfam2 genome coordinates	Converted Canfam3 genome coordinates	Gain or Loss	Protein Coding Genes, Broad Improved Canine Annotation v1 (many is >20 protein coding genes)
BACA	chr11:3004650-44014201	chr11:4,750-40,984,233	gain	many	MGAT1	CFRNASEQ_PROT_00020003	ZNF197	HSPE1	BTNL9	ENSCAFG00000028826	OR2V1	TRIM7	TRIM41	GNB2L1	TRIM52	ENSCAFG00000028829	ENSCAFG00000012657	ENSCAFG00000000502	ENSCAFG00000028671	ENSCAFG00000000497	ENSCAFG00000000494	ENSCAFG00000000491	ENSCAFG00000030653	ENSCAFG00000018149	FLT4	ENSCAFG00000030378	CNOT6	GFPT2	CFRNASEQ_PROT_00017424	MAPK9	RASGEF1C	RNF130	TBC1D9B	CTC-241N9.1(human)	C5orf45	SQSTM1	SQSTM1(human)	CFRNASEQ_PROT_00020126	CFRNASEQ_PROT_00020127	MGAT4B	LTC4S	MAML1	CANX	CBY3	ENSCAFG00000000336	RUFY1	ENSCAFG00000032181	ADAMTS2	ZNF354C
BACA	chr11:44505301-54318601	chr11:41,475,425-51,288,893	gain	many	DMRTA1	ELAVL2	ENSCAFG00000014096	IZUMO3	ENSCAFG00000007543	TUSC1	CAAP1	PLAA	IFT74	LRRC19	TEK	ENSCAFG00000001714	ENSCAFG00000029839	C9orf11	MOB3B	IFNK	C9orf72	LINGO2	ENSCAFG00000001734	ACO1	TOPORS	CFRNASEQ_PROT_00021898	CFRNASEQ_PROT_00021899	NDUFB6(human)	CFRNASEQ_PROT_00021904	TMEM215	APTX	LOC474739	SMU1	CFRNASEQ_PROT_00021936	B4GALT1	BAG1	SPINK4	CHMP5	AQP7	NFX1	AQP3	NOL6	UBE2R2	ENSCAFG00000025156	UBAP2	DCAF12	UBAP1	KIF24	NUDT2
BACA	chr11:54320701-77414701	chr11:51,290,993-74,387,340	loss	many	DCTN3	SIGMAR1	GALT	ENSCAFG00000001951	CCL27	CCL19	CCL21	CFRNASEQ_PROT_00022032	CFRNASEQ_PROT_00022033	KIAA1045	ENSCAFG00000028944	ENSCAFG00000020055	ENSCAFG00000030957	ENSCAFG00000025056	DNAJB5	C9orf131	VCP	PIGO	FAM214B	CFRNASEQ_PROT_00022087	UNC13B	ENSCAFG00000002045	ENSCAFG00000018740	RUSC2	FAM166B	CFRNASEQ_PROT_00019108	CFRNASEQ_PROT_00019109	TESK1	CD72	SIT1	CCDC107	C11H9orf100	CA9	TPM2	TLN1	CREB3	GBA2	RGP1	MSMP	NPR2	SPAG8	HINT2	CFRNASEQ_PROT_00019151	FAM221B	TMEM8B
BACA	chr13:3031050-31485301	chr13:31080-28448442	gain	many	LAPTM4B	MATN2	ENSCAFG00000031952	C8orf47	ENSCAFG00000030250	POP1	NIPAL2	CFRNASEQ_PROT_00030286	KCNS2	STK3	OSR2	VPS13B	CFRNASEQ_PROT_00030306	CFRNASEQ_PROT_00030308	COX6C(human)	RGS22	ENSCAFG00000000532	FBXO43	CFRNASEQ_PROT_00028561	CFRNASEQ_PROT_00028562	POLR2K(human)	ENSCAFG00000000548	RNF19A	CFRNASEQ_PROT_00030349	RNF19A(human)	ANKRD46	SNX31	PABPC1	YWHAZ	CFRNASEQ_PROT_00030390	ZNF706	GRHL2	NCALD	CFRNASEQ_PROT_00030422	ENSCAFG00000025578	RRM2B	UBR5	ENSCAFG00000030010	ENSCAFG00000000634	ODF1	KLF10	AZIN1	KB-1507C5.2(human)	ATP6V1C1	BAALC
BACA	chr13:31565701-66180001	chr13:28528842-63239453	gain	many	EFR3A	ENSCAFG00000001102	HHLA1	KCNQ3	CFRNASEQ_PROT_00031123	LRRC6	TMEM71	PHF20L1	TG	SLA	WISP1	NDRG1	ST3GAL1	ST3GAL1(human)	ENSCAFG00000029450	ZFAT	ENSCAFG00000031399	KHDRBS3	ENSCAFG00000001168	ENSCAFG00000029044	FAM135B	CFRNASEQ_PROT_00031234	FAM135B(human)	COL22A1	KCNK9	TRAPPC9	CHRAC1	EIF2C2	PTK2	CFRNASEQ_PROT_00031313	CFRNASEQ_PROT_00031318	DENND3	SLC45A4	ENSCAFG00000029505	GPR20	PTP4A3	ENSCAFG00000001250	ENSCAFG00000031926	TSNARE1	BAI1	ENSCAFG00000001272	ARC(human)	PSCA	THEM6	SLURP1
BACA	chr14:11308501-17394601	chr14:8351245-14445121	loss	many	SND1	ARF5	PAX4	GCC1	ZNF800	GRM8	ENSCAFG00000001744	ENSCAFG00000001747	POT1	GPR37	ENSCAFG00000001759	LSM3	TMEM229A	SPAM1	HYAL4	ENSCAFG00000024436	WASL	LMOD2	ASB15	CFRNASEQ_PROT_00035969	ENSCAFG00000025112	GRM3	KIAA1324L	DMTF1	C7orf23	C7orf23(human)	CROT	ABCB4	Q4PLA8_CANFA	RUNDC3B	SLC25A40	DBF4	ADAM22	SRI	STEAP4
BACA	chr16:3374401-62519632	chr16:384066-59584533	loss	many	ENSCAFG00000012301	IGFBP3	IGFBP1	ADCY1	ENSCAFG00000029006	ENSCAFG00000029647	CFRNASEQ_PROT_00041191	TRIM24(human)	PDIA4	EZH2	CUL1	ENSCAFG00000003479	ENSCAFG00000029696	CNTNAP2(human)	TPK1	ENSCAFG00000003493	SNRPN	NOBOX	ARHGEF5	ENSCAFG00000030963	ENSCAFG00000032026	ENSCAFG00000030583	OR2A2	OR2A14	OR2A12	OR2A25	OR2A5	OR6B1	ENSCAFG00000029411	OLF3_CANFA	ENSCAFG00000029291	FAM115A	FAM115C	TAS2R41	ENSCAFG00000003537	TAS2R16	EPHA1	ZYX	FAM131B	TMEM139	ENSCAFG00000029004	TAS2R40	TAS2R39	PIP	ENSCAFG00000003650
BACA	chr18:53121601-58854100	chr18:50095518-55826631	gain	many	POLD4	ANKRD13D	ADRBK1	KDM2A	RHOD	CFRNASEQ_PROT_00056156	CFRNASEQ_PROT_00056157	CFRNASEQ_PROT_00056158	CFRNASEQ_PROT_00056159	C11orf86	PC	C11orf80	SPTBN2	RBM4B	RBM14	Q6PXD7_CANFA	CCDC87	CTSF	ENSCAFG00000012504	ZDHHC24	ENSCAFG00000012580	PELI3	CFRNASEQ_PROT_00053479	MRPL11	NPAS4	SLC29A2	B3GNT1	BRMS1	RIN1	CD248	TMEM151A	YIF1A	CNIH2	ENSCAFG00000012855	KLC2	PACS1	SF3B2	GAL3ST3	CATSPER1	BANF1	EIF1AD	SART1	ENSCAFG00000013124	ENSCAFG00000028476	C11orf68
BACA	chr2:3000001-58056601	chr2:101-55184068	loss	many	ENSCAFG00000003666	ENSCAFG00000003668	ENSCAFG00000028469	ENSCAFG00000029576	FZD8	ENSCAFG00000023176	CCNY	CREM_CANFA	CUL2	ENSCAFG00000029571	PARD3	ENSCAFG00000003753	NRP1	ITGB1	CFRNASEQ_PROT_00059930	CCDC7	ENSCAFG00000007550	ENSCAFG00000029328	ENSCAFG00000024834	ENSCAFG00000023478	ENSCAFG00000023337	ENSCAFG00000023202	ENSCAFG00000024687	ANKRD62	ENSCAFG00000032223	ENSCAFG00000003859	RAB18	ENSCAFG00000013789	KATNB1	ENSCAFG00000014021	ENSCAFG00000030789	ANKRD26(human)	ENSCAFG00000023313	YME1L1	GWL_CANFA	ACBD5	ABI1	ENSCAFG00000004370	PDSS1	ENSCAFG00000031840	APBB1IP	GAD2	MYO3A	GPR158	THNSL1
BACA	chr26:27736801-40824901	chr26:24707344-37756223	gain	many	DEPDC5	YWHAH	Q5U9D0_CANFA	SLC5A4	ENSCAFG00000031415	ENSCAFG00000029323	ENSCAFG00000030555	ENSCAFG00000023843	ENSCAFG00000024720	ENSCAFG00000029878	ENSCAFG00000032195	ENSCAFG00000029939	ENSCAFG00000030935	ENSCAFG00000031403	ENSCAFG00000029243	ENSCAFG00000030735	ENSCAFG00000030602	ENSCAFG00000032078	ENSCAFG00000031637	ENSCAFG00000031927	ENSCAFG00000032249	ENSCAFG00000032325	ENSCAFG00000029746	ENSCAFG00000029467	ENSCAFG00000029435	ENSCAFG00000023160	ENSCAFG00000032232	IGLV11-55	ENSCAFG00000013551	ENSCAFG00000029236	ENSCAFG00000031653	ENSCAFG00000023920	ENSCAFG00000032706	ENSCAFG00000013587	ZNF280B	PRAME	ENSCAFG00000013622	ENSCAFG00000032328	ENSCAFG00000031196	ENSCAFG00000031786	ENSCAFG00000015176	ENSCAFG00000031273	ENSCAFG00000014432	ENSCAFG00000031733	ENSCAFG00000029493
BACA	chr38:21271501-26462401	chr38:18271880-23449493	loss	many	CFRNASEQ_PROT_00139207	PBX1	NUF2	RGS5	RGS4	C1orf110	HSD17B7	DDR2	UAP1	UHMK1	SH2D1B	ENSCAFG00000013086	C1orf111	OLFML2B	ATF6	DUSP12	FCRLB	FCRLA	ENSCAFG00000013035	ENSCAFG00000013015	SDHC	C1orf192	MPZ	PCP4L1	B6E443_CANFA	TOMM40L	NDUFS2	ADAMTS4	B4GALT3	USP21	UFC1	DEDD	NIT1	PFDN2	KLHDC9	PVRL4	ARHGAP30	F11R	CFRNASEQ_PROT_00138427	CFRNASEQ_PROT_00138428	CD244	LY9	SLAMF7	CD48	SLAF1_CANFA
BACA	chrUn:61669-9766980	chrUn_JH373233:61669-2660953 (26.2% of bases, 26.8% of span); chrUn_JH373234:1-1881673 (17.4% of bases, 19.4% of span); chrUn_JH373235:1-1415205 (13.4% of bases, 14.6% of span); chrUn_JH373236:1-1067467 (9.5% of bases, 11.0% of span); chrUn_JH373237:1-866315 (8.9% of bases, 8.9% of span); chrUn_JH373238:1-881102 (8.5% of bases, 9.1% of span); chrUn_JH373239:1-822601 (8.2% of bases, 8.5% of span);…	gain	none
BACA	chrX:3001-6600301	chrX:3001-6645013	loss	many	ENSCAFG00000031744	ENSCAFG00000029674	ENSCAFG00000010945	ENSCAFG00000028761	GTPBP6	PLCXD1	SHOX	CRLF2	CSF2RA	ENSCAFG00000031295	IL3RA	SLC25A6	ENSCAFG00000032218	ENSCAFG00000029091	ASMT	ENSCAFG00000030459	ENSCAFG00000028620	ASMTL	ENSCAFG00000029462	ENSCAFG00000030381	SLC25A6(human)	DHRSX	ENSCAFG00000028845	CD99	XG	GYG2	ARSD	ARSH	Q32KI0_CANFA	MXRA5	ENSCAFG00000032309	PRKX	ENSCAFG00000011192	ENSCAFG00000031750	ENSCAFG00000032113	OBP	ENSCAFG00000011251	ENSCAFG00000029931	HDHD1	ENSCAFG00000030093	STS	CFRNASEQ_PROT_00187119	ENSCAFG00000004314	PNPLA4	KAL1
[truncated: 410 more columns]

## Sheet: clacLgGainLossAnnotat
Cell Line	Canfam2 genome coordinates	Converted Canfam3 genome coordinates	Gain or Loss	Protein Coding Genes, Broad Improved Canine Annotation v1 (many is >20 protein coding genes)
CLAC	chr13:3031050-66180001	chr13:31080-63239453	gain	many	LAPTM4B	MATN2	ENSCAFG00000031952	C8orf47	ENSCAFG00000030250	POP1	NIPAL2	CFRNASEQ_PROT_00030286	KCNS2	STK3	OSR2	VPS13B	CFRNASEQ_PROT_00030306	CFRNASEQ_PROT_00030308	COX6C(human)	RGS22	ENSCAFG00000000532	FBXO43	CFRNASEQ_PROT_00028561	CFRNASEQ_PROT_00028562	POLR2K(human)	ENSCAFG00000000548	RNF19A	CFRNASEQ_PROT_00030349	RNF19A(human)	ANKRD46	SNX31	PABPC1	YWHAZ	CFRNASEQ_PROT_00030390	ZNF706	GRHL2	NCALD	CFRNASEQ_PROT_00030422	ENSCAFG00000025578	RRM2B	UBR5	ENSCAFG00000030010	ENSCAFG00000000634	ODF1	KLF10	AZIN1	KB-1507C5.2(human)	ATP6V1C1	BAALC
CLAC	chr17:20683201-26348701	chr17:17701251-23246015	gain	many	KLHL29	ATAD2B	ENSCAFG00000031376	ENSCAFG00000029762	MFSD2B	C2orf44	ENSCAFG00000003950	FKBP1B	TP53I3	PFN4	ENSCAFG00000030215	ITSN2	E0A8T3_CANFA	CFRNASEQ_PROT_00046524	CFRNASEQ_PROT_00046546	PTRHD1	CENPO	ADCY3	DNAJC27	EFR3B	POMC	DNMT3A	CFRNASEQ_PROT_00049367	DTNB	ENSCAFG00000004240	ASXL2	KIF3C	RAB10	FAM59B	HADHA	ENSCAFG00000029395	GPR113	EPT1	CCDC164	OTOF	C2orf70	CIB4	KCNK3	CENPA	DPYSL5	MAPRE3	TMEM214	C2orf53	AGBL5	EMILIN1
CLAC	chr17:3001900-12079501	chr17:26167-9107317	gain	many	FAM110C	SH3YL1	CFRNASEQ_PROT_00045905	ACP1	CFRNASEQ_PROT_00048731	CFRNASEQ_PROT_00048732	FAM150B(human)	ENSCAFG00000003206	AC092159.3(human)	CFRNASEQ_PROT_00048750	SNTG2	TPO	PXDN	MYT1L	TSSC1	TRAPPC12	ENSCAFG00000031218	RNASEH1	RPS7	COLEC11	ALLC	DCDC2C	SOX11	AC010729.1(human)	CMPK2	RSAD2(human)	RSAD2	RNF144A	CFRNASEQ_PROT_00046033	CFRNASEQ_PROT_00046057	ID2(human)	KIDINS220	MBOAT2	ASAP2	ITGB1BP1	CPSF3	IAH1	Q56JJ1_CANFA	ENSCAFG00000003386	TAF1B	GRHL1	KLF11	CYS1(human)	CFRNASEQ_PROT_00048993	CFRNASEQ_PROT_00046106
CLAC	chr17:36582001-43527301	chr17:33474524-40463840	gain	many	AC013480.1(human)	PKDCC	EML4	COX7A2L	CFRNASEQ_PROT_00049918	KCNG3	MTA3	ARID5A	ENSCAFG00000006550	ITPRIPL1	NCAPH	CFRNASEQ_PROT_00047213	SNRNP200(human)	CIAO1	TMEM127	STARD7	DUSP2	CFRNASEQ_PROT_00047230	ASTL(human)	ADRA2B	GPAT2	ENSCAFG00000006862	KCNIP3	PROM2	ENSCAFG00000030667	ZNF2	CFRNASEQ_PROT_00047240	ZNF514	MRPS5	MAL	MALL	NPHP1	TPC3	BUB1	ACOXL	ENSCAFG00000001564	BCL2L11	ENSCAFG00000023277	ANAPC1	MERTK	TMEM87B	FBLN7	ZC3H8	ZC3H6	ENSCAFG00000031118
CLAC	chr17:51269701-59758013	chr17:48200132-56684285	gain	many	NRAS	POLE4	HK2	SEMA4F	C2orf65	DOK1	LOXL3	Q45FF7_CANFA	DQX1	TLX2	LBX2	TTC31	MOGS	WBP1	RTKN	WDR54	DHRS13	DCTN1	SLC4A5	MTHFD2	MOB1A	BOLA3	TET3	DGUOK	ACTG2	CFRNASEQ_PROT_00050551	CFRNASEQ_PROT_00050553	CFRNASEQ_PROT_00050554	ENSCAFG00000028649	C2orf78	DUSP11	TPRKB	NAT8	ALMS1	ENSCAFG00000008835	EGR4	FBXO41	ENSCAFG00000008879	CFRNASEQ_PROT_00050598	PRADC1	SMYD5	NOTO	RAB11FIP5	SFXN5	EMX1
CLAC	chr17:59863711-67222850	chr17:56788643-64143250	gain	many	ENSCAFG00000030875	ENSCAFG00000010128	NOTCH2	ENSCAFG00000010738	PDE4DIP	ENSCAFG00000028490	ENSCAFG00000010847	ENSCAFG00000028699	ENSCAFG00000028820	ENSCAFG00000023683	ENSCAFG00000023838	PRKAB2	CFRNASEQ_PROT_00050959	FMO5	CHD1L	ENSCAFG00000011043	BCL9	ACP6	CXA5_CANFA	GJA8	ENSCAFG00000011110	ENSCAFG00000028546	CD160	RNF115	ENSCAFG00000024445	POLR3C	NUDT17	PIAS3	ANKRD35	LIX1L	GNRHR2(human)	ANKRD34A	POLR3GL	TXNIP	HFE2	ENSCAFG00000023625	ENSCAFG00000029779	ENSCAFG00000002465	FCGR1A	ENSCAFG00000029877	HIST1H4C	ENSCAFG00000029399	ENSCAFG00000031760	HIST2H2AA4	SV2A
CLAC	chr18:51416401-56832001	chr18:48390461-53805139	gain	many	FGF4	FGF19	ORAOV1	CCND1	TPCN2	MTL5	MRGPRF	IGHMBP2	MRPL21	CPT1A	ENSCAFG00000010770	GALA_CANFA	PPP6R3	ENSCAFG00000029209	C7FDX9_CANFA	C11orf24	SUV420H1	CHKA	TCIRG1	NDUFS8	ENSCAFG00000011171	ENSCAFG00000011210	ALDH3B2	TBX10	ENSCAFG00000011297	NDUFV1	ENSCAFG00000030866	GSTP1	CABP2	CDK2AP2	PITPNM1	AIP	TMEM134	CABP4	GPR152	PPP1CA	RPS6KB2	TBC1D10C	RAD9A	CLCF1	POLD4	ANKRD13D	ADRBK1	KDM2A	RHOD
CLAC	chr8:3030953-77306701	chr8:31062-74321923	gain	many	ZNF496	ENSCAFG00000032126	NLRP3	ENSCAFG00000010708	OR2B11	ENSCAFG00000010776	GCSAML	ENSCAFG00000010792	OR6C4	ENSCAFG00000010800	OR4L1	CATSPERB	TC2N	FBLN5	TRIP11	ENSCAFG00000010893	CPSF2	SLC24A4	CFRNASEQ_PROT_00170300	RIN3	LGMN	GOLGA5	CHGA	ITPK1	ENSCAFG00000029069	ENSCAFG00000014977	ENSCAFG00000014973	ENSCAFG00000024337	ENSCAFG00000028548	ENSCAFG00000031023	ENSCAFG00000011090	ENSCAFG00000011092	TRAV21	AE000660.6(human)	TRAV24	TRAV29DV5	TRDV1	TRAV26-2	TRAV34	ENSCAFG00000025180	ENSCAFG00000029747	ENSCAFG00000029024	TRDV2	TRDC	TRDV3
CLAC	chr11:44123101-52896901	chr11:41,093,133-49,868,421	loss	many	ENSCAFG00000001671	ENSCAFG00000001675	CDKN2B	CFRNASEQ_PROT_00021621	CFRNASEQ_PROT_00018836	DMRTA1	ELAVL2	ENSCAFG00000014096	IZUMO3	ENSCAFG00000007543	TUSC1	PLAA	IFT74	LRRC19	IFT74	TEK	ENSCAFG00000001714	ENSCAFG00000029839	C9orf11	MOB3B	IFNK	C9orf72	LINGO2	ENSCAFG00000001734	ACO1	TOPORS	CFRNASEQ_PROT_00021898	CFRNASEQ_PROT_00021899	NDUFB6 (human)	CFRNASEQ_PROT_00021904	GNE	RNF38
CLAC	chr11:60056701-63065101	chr11:57,026,902-60,036,514	loss	ENSCAFG00000002542	INVS_CANFA	TEX10	ENSCAFG00000002577	ENSCAFG00000002586	ENSCAFG00000002590	BAAT	MRPL50	ZNF189	ALDOB	TMEM246	RNF20	GRIN3A	CYLC2	CFRNASEQ_PROT_00019452	ENSCAFG00000030806
CLAC	chr15:28950601-32868001	chr15:25944266-29854950	loss	SLC6A15	TSPAN19	CFRNASEQ_PROT_00039890	LRRIQ1	ALX1	RASSF9	NEUT_CANFA	MGAT4C	CFRNASEQ_PROT_00039976	C12orf50	C12orf29	CEP290	TMTC3	ENSCAFG00000029427	SCF_CANFA
CLAC	chr15:59781601-63343201	chr15:56761915-60325522	loss	FSTL5	NAF1	CFRNASEQ_PROT_00040927	NPY1R_CANFA	NPY5R	TMA16	March1
CLAC	chr16:31178701-35927101	chr16:28225946-32973923	loss	ENSCAFG00000023937	KCNU1	UNC5D	CFRNASEQ_PROT_00044628	CFRNASEQ_PROT_00044629	DUSP26	RNF122	TTI2	MAK16	FUT10	ENSCAFG00000006342	NRG1
CLAC	chr16:4212250-7917301	chr16:1233059-4936371	loss	ENSCAFG00000029647	CFRNASEQ_PROT_00041191	TRIM24(human)	PDIA4	EZH2	CUL1	ENSCAFG00000003479	ENSCAFG00000029696	CNTNAP2(human)
CLAC	chr16:50503250-54916801	chr16:47541355-51957350	loss	ODZ3	CFRNASEQ_PROT_00045485	ENSCAFG00000031456	DNMT1
CLAC	chr19:27165901-30777601	chr19:24147742-27758568	loss	ENSCAFG00000004632	ENSCAFG00000004640	ENSCAFG00000004650	CNTP5_CANFA
CLAC	chr19:7018201-14725801	chr19:4017431-11722433	loss	SLC7A11	PCDH18	ENSCAFG00000030512	ENSCAFG00000028734	ENO1	PCDH10	ENSCAFG00000003796
CLAC	chr20:17440501-21663001	chr20:14438775-18659743	loss	CNTN4	CNTN6	CHL1	ENSCAFG00000024304	ENSCAFG00000006312	PGK1	ENSCAFG00000006327	CNTN3	CFRNASEQ_PROT_00068270	PDZRN3
CLAC	chr20:30799201-34656301	chr20:27804067-31662044	loss	SYNPR	CADPS	FEZF2	C3orf14	PTPRG	ENSCAFG00000007181	ENSCAFG00000007791	U6	FHIT
CLAC	chr21:10694701-15305101	chr21:7696245-12306924	loss	FAT3	RPS24	ENSCAFG00000004270	ENSCAFG00000025134	ENSCAFG00000004288	CHORDC1	NAALAD2	ENSCAFG00000004330	ENSCAFG00000024962	ENSCAFG00000024959	ENSCAFG00000004356	FOLH1	NOX4	TYR	GRM5	ENSCAFG00000004384	RAB38
CLAC	chr21:16804201-22467901	chr21:13805722-19463913	loss	TMEM126B	CFRNASEQ_PROT_00074954	CFRNASEQ_PROT_00074958	CFRNASEQ_PROT_00074960	CFRNASEQ_PROT_00074961	CFRNASEQ_PROT_00074966	CFRNASEQ_PROT_00075029	DLG2	CFRNASEQ_PROT_00075077	CCDC90B	ENSCAFG00000032623	PCF11	RAB30	C11orf82	PRCP	ENSCAFG00000014107	FAM181B
CLAC	chr21:3031450-7619401	chr21:31550-4623692	loss	ENSCAFG00000003974	PGR	CFRNASEQ_PROT_00074669	ARHGAP42	CNTN5
CLAC	chr21:45920701-49768801	chr21:42730236-46575817	loss	NELL1	ANO5	SLC17A6	FANCF	GAS2	SVIP	LOC476890	UBE2D3	LUZP2
CLAC	chr23:23749801-27336301	chr23:20,700,964-24,283,950	loss	ZNF385D	ENSCAFG00000030688	SGOL1	KAT2B	PP2D1	RAB5A_CANFA	EFHB	ENSCAFG00000005822	KCNH8	ENSCAFG00000005831
CLAC	chr25:23661001-28982401	chr25:20679664-25996677	loss	many	MFAP3L	AADAT	ENSCAFG00000029275	ENSCAFG00000007743	CFRNASEQ_PROT_00090974	GALNTL6(human)	CFRNASEQ_PROT_00090976	ENSCAFG00000007798	CFRNASEQ_PROT_00091111	GALNTL6	ENSCAFG00000007840	HMGB2	CFRNASEQ_PROT_00091145	SAP30	SCRG1	HAND2	FBXO8	CFRNASEQ_PROT_00093282	CEP44	HPGD	GLRA3	ADAM29	DEFB131	DEFB134(human)	DEFB136
CLAC	chr28:20311201-24093301	chr28:17308238-21092204	loss	SORCS3	ENSCAFG00000024653	SORCS1
CLAC	chr29:31997701-41057101	chr29:28993710-38073129	loss	many	CFRNASEQ_PROT_00107397	CFRNASEQ_PROT_00107450	ENSCAFG00000025329	ENSCAFG00000008570	SLC7A13	LRRCC1	E2F5	CA13	CA1	CA3	CA2	PSKH2	CFRNASEQ_PROT_00108672	CFRNASEQ_PROT_00108673	ATP6V0D2	CFRNASEQ_PROT_00108675	CFRNASEQ_PROT_00108676	CFRNASEQ_PROT_00107565	WWP1	FAM82B	CPNE3	CNGB3	CNBD1	ENSCAFG00000030436	ENSCAFG00000008935	MMP16	ENSCAFG00000029124	ENSCAFG00000008955	RIPK2	OSGIN2	ENSCAFG00000008992	ENSCAFG00000032543	DECR1	CALB1	TMEM64	NECAB1	TMEM55A	OTUD6B	LRRC69	SLC26A7	RUNX1T1	CFRNASEQ_PROT_00108786	CFRNASEQ_PROT_00108787	CFRNASEQ_PROT_00108788	CFRNASEQ_PROT_00108789
CLAC	chr3:22081501-26813701	chr3:19197353-23930710	loss	MEF2C	TMEM161B	CCNH	RASA1	EDIL3
CLAC	chr3:77803201-86260801	chr3:74978202-83439479	loss	DTHD1	ARAP2	ENSCAFG00000016329	PCDH7	ENSCAFG00000029510
CLAC	chr36:29793601-33840025	chr36:26765419-30810664	loss	STK19	ZNF804A	FSIP2	ZC3H15	ITGAV	FAM171B	ZSWIM2	CALCRL	CFRNASEQ_PROT_00135276	Q28874_CANFA	GULP1	E5G724_CANFA	COL5A2
CLAC	chr36:3001501-18994801	chr36:1601-15974269	loss	many	ENSCAFG00000029958	RPRM(human)	MINOS1	GALNT13	ENSCAFG00000009172	KCNJ3	ENSCAFG00000009188	ENSCAFG00000029956	NR4A2	GPD2	ENSCAFG00000009250	GALNT5	ERMN	CYTIP	ACVR1C	ACVR1	CFRNASEQ_PROT_00134289	CFRNASEQ_PROT_00134292	UPP2(human)	CFRNASEQ_PROT_00133272	CCDC148	CFRNASEQ_PROT_00133273	PKP4	DAPL1	CFRNASEQ_PROT_00133324	TANC1	WDSUB1	BAZ2B	2015-03-07	A8WH73_CANFA	ENSCAFG00000023972	PLA2R1	ITGB6	CFRNASEQ_PROT_00134401	RBMS1	CFRNASEQ_PROT_00134439	TANK	CFRNASEQ_PROT_00133408	CFRNASEQ_PROT_00133409	CFRNASEQ_PROT_00133419	PSMD14	TBR1	SLC4A10	DPP4	GCG
CLAC	chr38:5885101-14681701	chr38:2885255-11682002	loss	many	ENSCAFG00000010290	CFRNASEQ_PROT_00137992	CFRNASEQ_PROT_00138004	CFRNASEQ_PROT_00138005	CFRNASEQ_PROT_00138007	KCNT2	ENSCAFG00000010472	A2SXS7_CANFA	B3GALT2	GLRX2	TROVE2	UCHL5	RGS2	RGS13	RGS1	RGS21	RGS18	FAM5C	ENSCAFG00000028763	ENSCAFG00000002103	ENSCAFG00000029859	KCTD3	USH2A
[truncated: 644 more columns]

## Sheet: focal loss genes
Broad Protein Coding Annotation v1	Conversion to Gene Name Abbreviation
AHCYL2	AHCYL2
AP1B1	AP1B1
ARHGAP15	ARHGAP15
ARHGAP24	ARHGAP24
ARHGAP27	ARHGAP27
ENSCAFG00000019256	ATAD3B
ATP6V1F	ATP6V1F
C22orf31	C22orf31
C8orf48	C8orf48
CALU	CALU
CARD8	CARD8
CCDC117	CCDC117
CCDC136	CCDC136
CCL20	CCL20
CDKN2B	CDKN2B
CDKN2B	CDKN2B
CDYL2	CDYL2
CHEK2	CHEK2
CMKLR1	CMKLR1
CRTC3	CRTC3
ENSCAFG00000013883	Ctage5
ENSCAFG00000013221	CTNNA3
DIAPH2	DIAPH2
DMD	DMD
DNER	DNER
DPP10	DPP10
DUSP10	DUSP10
DYNLRB2	DYNLRB2
EMID1	EMID1
FAM190A	FAM190A
FAM40B	FAM40B
FAM71F1	FAM71F1
FAM71F2	FAM71F2
FBXO33	FBXO33
FICD	FICD
FLNC	FLNC
GAS2L1	GAS2L1
GEMIN2	GEMIN2
HERC2	HERC2
HMGCS2	HMGCS2
HSCB	HSCB
IL1RAPL2	IL1RAPL2
IMPDH1	IMPDH1
INTU	INTU
IQGAP1	IQGAP1
IRF5	IRF5
KREMEN1	KREMEN1
KYNU	KYNU
LEP	LEP
LRP1B	LRP1B
LRRC4	LRRC4
LUZP2	LUZP2
MAGI2	MAGI2
MSR1	MSR1
NAALADL2	NAALADL2
NEFH	NEFH
NF2	NF2
NIPSNAP1	NIPSNAP1
NRF1	NRF1
OCA2	OCA2
OPN1SW	OPN1SW
OR51F1	OR51F1
PARK2	PARK2
PID1	PID1
PIWIL2	PIWIL2
PNN	PNN
POLR3D	POLR3D
PPP3CC	PPP3CC
PRRT4	PRRT4
RANBP17	RANBP17
RASL10A	RASL10A
RBM28	RBM28
ENSCAFG00000015160	Rdm1
RHBDD3	RHBDD3
RHG07_CANFA	RHG07
RPL38	RPL38
RPS27L	RPS27L
SEC23A	SEC23A
SGCZ	SGCZ
SGSM1	SGSM1
SLC19A3	SLC19A3
SLC39A14	SLC39A14
SMO	SMO
SND1	SND1
SPHKAP	SPHKAP
SSU72	SSU72
TMEM240	TMEM240
TNPO3	TNPO3
TRAPPC6B	TRAPPC6B
TSPAN33	TSPAN33
TTC28	TTC28
TUSC3	TUSC3
TUSC7	TUSC7
UBE2H	UBE2H
UNC13C	UNC13C
VPS13D	VPS13D
VWA1	VWA1
WDR69	WDR69
WDR72	WDR72
WSCD2	WSCD2
ZFHX3	ZFHX3
ZNRF3	ZNRF3
CFRNASEQ_PROT_00018836
CFRNASEQ_PROT_00018836
CFRNASEQ_PROT_00021621
CFRNASEQ_PROT_00021621
CFRNASEQ_PROT_00045078
CFRNASEQ_PROT_00052279
CFRNASEQ_PROT_00052280
CFRNASEQ_PROT_00052281
CFRNASEQ_PROT_00058916
CFRNASEQ_PROT_00058970
CFRNASEQ_PROT_00059069
CFRNASEQ_PROT_00059176
CFRNASEQ_PROT_00059550
CFRNASEQ_PROT_00060649
CFRNASEQ_PROT_00060650
CFRNASEQ_PROT_00060651
CFRNASEQ_PROT_00093903
CFRNASEQ_PROT_00095418
CFRNASEQ_PROT_00095556
CFRNASEQ_PROT_00095609
CFRNASEQ_PROT_00102031
CFRNASEQ_PROT_00102032
CFRNASEQ_PROT_00123107
CFRNASEQ_PROT_00123176
CFRNASEQ_PROT_00123233
CFRNASEQ_PROT_00166923
CFRNASEQ_PROT_00166924
CFRNASEQ_PROT_00166925
CFRNASEQ_PROT_00166926
CFRNASEQ_PROT_00166927
CFRNASEQ_PROT_00166928
CFRNASEQ_PROT_00166929
CFRNASEQ_PROT_00166930
CFRNASEQ_PROT_00166932
CFRNASEQ_PROT_00166933
CFRNASEQ_PROT_00166934
CFRNASEQ_PROT_00166935
CFRNASEQ_PROT_00166936
CFRNASEQ_PROT_00166938
CFRNASEQ_PROT_00166939
CFRNASEQ_PROT_00166940
ENSCAFG00000001499
ENSCAFG00000001530
ENSCAFG00000001616
ENSCAFG00000001675
ENSCAFG00000001675
ENSCAFG00000005303
ENSCAFG00000006341
ENSCAFG00000007469
ENSCAFG00000009954
ENSCAFG00000009965
ENSCAFG00000010553
ENSCAFG00000010555
ENSCAFG00000011954
ENSCAFG00000012160
ENSCAFG00000013264
ENSCAFG00000014432
ENSCAFG00000014968
ENSCAFG00000014968
ENSCAFG00000015176
ENSCAFG00000016278
ENSCAFG00000016289
ENSCAFG00000017850
ENSCAFG00000019080
ENSCAFG00000023349
ENSCAFG00000023661
ENSCAFG00000024630
ENSCAFG00000024643
ENSCAFG00000025589
ENSCAFG00000028735
ENSCAFG00000028889
ENSCAFG00000028979
ENSCAFG00000029279
ENSCAFG00000029476
ENSCAFG00000029705
ENSCAFG00000029750
ENSCAFG00000029863
ENSCAFG00000029973
ENSCAFG00000030107
ENSCAFG00000030511
ENSCAFG00000030677
ENSCAFG00000030875
ENSCAFG00000031071
ENSCAFG00000031160
ENSCAFG00000031196
ENSCAFG00000031273
ENSCAFG00000031375
ENSCAFG00000031387
ENSCAFG00000031786
ENSCAFG00000032099
ENSCAFG00000032229
ENSCAFG00000032328
ENSCAFG00000032512
ENSCAFG00000032531

## Sheet: bacaFocal
BACA	loss	AHCYL2
BACA	loss	AP1B1
BACA	loss	ARHGAP27
BACA	loss	ATP6V1F
BACA	loss	C22orf31
BACA	loss	CALU
BACA	loss	CCDC117
BACA	loss	CCDC136
BACA	gain	CCDC148
BACA	loss	CDKN2B
BACA	loss	CDKN2A
BACA	loss	CDKN2B-AS1
BACA	loss	CDYL2
BACA	loss	CFRNASEQ_PROT_00018836
BACA	loss	CFRNASEQ_PROT_00021621
BACA	loss	CFRNASEQ_PROT_00052279
BACA	loss	CFRNASEQ_PROT_00052280
BACA	loss	CFRNASEQ_PROT_00052281
BACA	loss	CFRNASEQ_PROT_00095418
BACA	loss	CFRNASEQ_PROT_00095556
BACA	loss	CFRNASEQ_PROT_00095609
BACA	loss	CFRNASEQ_PROT_00102032
BACA	loss	CFRNASEQ_PROT_00166923
BACA	loss	CFRNASEQ_PROT_00166925
BACA	loss	CFRNASEQ_PROT_00166926
BACA	loss	CFRNASEQ_PROT_00166927
BACA	loss	CFRNASEQ_PROT_00166928
BACA	loss	CFRNASEQ_PROT_00166929
BACA	loss	CFRNASEQ_PROT_00166930
BACA	loss	CFRNASEQ_PROT_00166932
BACA	loss	CFRNASEQ_PROT_00166933
BACA	loss	CFRNASEQ_PROT_00166934
BACA	loss	CFRNASEQ_PROT_00166935
BACA	loss	CFRNASEQ_PROT_00166936
BACA	loss	CFRNASEQ_PROT_00166938
BACA	loss	CFRNASEQ_PROT_00166939
BACA	loss	CFRNASEQ_PROT_00166940
BACA	loss	CHEK2
BACA	loss	CRTC3
BACA	loss	DIAPH2
BACA	loss	DUSP10
BACA	loss	EMID1
BACA	gain	ENSCAFG00000001253
BACA	gain	ENSCAFG00000001257
BACA	gain	ENSCAFG00000001268
BACA	loss	ENSCAFG00000001499
BACA	loss	ENSCAFG00000001530
BACA	loss	ENSCAFG00000001616
BACA	loss	ENSCAFG00000001675
BACA	loss	ENSCAFG00000005303
BACA	loss	ENSCAFG00000006341
BACA	loss	ENSCAFG00000011954
BACA	loss	ENSCAFG00000012160
BACA	loss	ENSCAFG00000013883
BACA	loss	ENSCAFG00000014968
BACA	loss	ENSCAFG00000015160
BACA	loss	ENSCAFG00000016278
BACA	loss	ENSCAFG00000016289
BACA	gain	ENSCAFG00000018499
BACA	loss	ENSCAFG00000019080
BACA	gain	ENSCAFG00000023319
BACA	gain	ENSCAFG00000023624
BACA	loss	ENSCAFG00000023661
BACA	gain	ENSCAFG00000024111
BACA	gain	ENSCAFG00000024224
BACA	loss	ENSCAFG00000025589
BACA	gain	ENSCAFG00000028509
BACA	loss	ENSCAFG00000028735
BACA	gain	ENSCAFG00000029299
BACA	loss	ENSCAFG00000029476
BACA	loss	ENSCAFG00000029705
BACA	loss	ENSCAFG00000029750
BACA	gain	ENSCAFG00000029996
BACA	gain	ENSCAFG00000030001
BACA	loss	ENSCAFG00000030107
BACA	gain	ENSCAFG00000030236
BACA	gain	ENSCAFG00000030258
BACA	gain	ENSCAFG00000030284
BACA	loss	ENSCAFG00000030511
BACA	loss	ENSCAFG00000030875
BACA	gain	ENSCAFG00000030894
BACA	gain	ENSCAFG00000030900
BACA	gain	ENSCAFG00000031139
BACA	loss	ENSCAFG00000031375
BACA	loss	ENSCAFG00000031387
BACA	gain	ENSCAFG00000031578
BACA	gain	ENSCAFG00000031924
BACA	loss	ENSCAFG00000032099
BACA	loss	ENSCAFG00000032512
BACA	loss	ENSCAFG00000032531
BACA	loss	FAM40B
BACA	loss	FAM71F1
BACA	loss	FAM71F2
BACA	loss	FBXO33
BACA	loss	FICD
BACA	gain	FIGN
BACA	loss	FLNC
BACA	gain	GALNT3
BACA	loss	GAS2L1
BACA	loss	GEMIN2
BACA	loss	HMGCS2
BACA	loss	HSCB
BACA	loss	IMPDH1
BACA	loss	INTU
BACA	loss	IRF5
BACA	loss	KREMEN1
BACA	loss	LEP
BACA	loss	LRRC4
BACA	loss	LUZP2
BACA	gain	MAD2L1
BACA	loss	MAGI2
BACA	loss	many
BACA	loss	many
BACA	loss	NAALADL2
BACA	loss	NEFH
BACA	loss	NF2
BACA	loss	NIPSNAP1
BACA	gain	NLRP13
BACA	gain	NLRP5
BACA	gain	NLRP8
BACA	loss	NRF1
BACA	loss	OPN1SW
BACA	gain	OR14C36
BACA	gain	OR14I1
BACA	gain	OR2G6
BACA	gain	OR2T11
BACA	gain	OR2T27
BACA	gain	OR2T6
BACA	loss	PARK2
BACA	gain	PKP4
BACA	loss	PNN
BACA	loss	PRRT4
BACA	gain	Q0Q0H3_CANFA
BACA	gain	Q0Q0H5_CANFA
BACA	loss	RANBP17
BACA	loss	RASL10A
BACA	loss	RBM28
BACA	loss	RHBDD3
BACA	loss	RPL38
BACA	loss	RPS27L
BACA	gain	SCN9A
BACA	gain	SESTD1
BACA	loss	SGSM1
BACA	loss	SMO
BACA	loss	SND1
BACA	loss	SSU72
BACA	loss	TMEM240
BACA	gain	TMSB15B
BACA	loss	TNPO3
BACA	loss	TRAPPC6B
BACA	loss	TSPAN33
BACA	gain	TTC21B
BACA	loss	TUSC7
BACA	loss	UBE2H
BACA	loss	VPS13D
BACA	loss	VWA1
BACA	loss	WSCD2
BACA	loss	ZFHX3
BACA	loss	ZNRF3

## Sheet: clacFocal
CLAC	gain	CYP51A1
CLAC	gain	AC022498.1(human)
CLAC	gain	ANKIB1
CLAC	gain	ANKIB1
CLAC	gain	APOB
CLAC	gain	ARHGAP27
CLAC	gain	ARL14
CLAC	gain	B3GALNT1
CLAC	gain	BCL6
CLAC	gain	C2orf43
CLAC	gain	C3orf80
CLAC	gain	CCDC141
CLAC	gain	CCDC141
CLAC	gain	CDK6
CLAC	gain	CFRNASEQ_PROT_00034724
CLAC	gain	CFRNASEQ_PROT_00034726
CLAC	gain	CFRNASEQ_PROT_00128760
CLAC	gain	CFRNASEQ_PROT_00128843
CLAC	gain	CFRNASEQ_PROT_00128846
CLAC	gain	CFRNASEQ_PROT_00129715
CLAC	gain	CFRNASEQ_PROT_00130298
CLAC	gain	CFRNASEQ_PROT_00130516
CLAC	gain	CLDN1
CLAC	gain	CLDN16
CLAC	gain	CTSC
CLAC	gain	CWC22
CLAC	gain	CWC22
CLAC	gain	DFNB59
CLAC	gain	DNAH5
CLAC	gain	EFHB
CLAC	gain	ENSCAFG00000001253
CLAC	gain	ENSCAFG00000001257
CLAC	gain	ENSCAFG00000001268
CLAC	gain	ENSCAFG00000001971
CLAC	gain	ENSCAFG00000001971
CLAC	gain	ENSCAFG00000003845
CLAC	gain	ENSCAFG00000005822
CLAC	gain	ENSCAFG00000005831
CLAC	gain	ENSCAFG00000013704
CLAC	gain	ENSCAFG00000013927
CLAC	gain	ENSCAFG00000014025
CLAC	gain	ENSCAFG00000014025
CLAC	gain	ENSCAFG00000014321
CLAC	gain	ENSCAFG00000023319
CLAC	gain	ENSCAFG00000028735
CLAC	gain	ENSCAFG00000028776
CLAC	gain	ENSCAFG00000028776
CLAC	gain	ENSCAFG00000029447
CLAC	gain	ENSCAFG00000029841
CLAC	gain	ENSCAFG00000029888
CLAC	gain	ENSCAFG00000029938
CLAC	gain	ENSCAFG00000029973
CLAC	gain	ENSCAFG00000030236
CLAC	gain	ENSCAFG00000030688
CLAC	gain	ENSCAFG00000030715
CLAC	gain	ENSCAFG00000030717
CLAC	gain	ENSCAFG00000030832
CLAC	gain	ENSCAFG00000031139
CLAC	gain	ENSCAFG00000031171
CLAC	gain	ENSCAFG00000031337
CLAC	gain	ENSCAFG00000031375
CLAC	gain	ENSCAFG00000031578
CLAC	gain	ENSCAFG00000031645
CLAC	gain	ENSCAFG00000031848
CLAC	gain	ENSCAFG00000031850
CLAC	gain	ENSCAFG00000031850
CLAC	gain	ENSCAFG00000031924
CLAC	gain	ENSCAFG00000032099
CLAC	gain	ENSCAFG00000032381
CLAC	gain	ENSCAFG00000032531
CLAC	gain	FAM105A
CLAC	gain	FAM105B
CLAC	gain	FAM133B(human)
CLAC	gain	FKBP7
CLAC	gain	GATAD1
CLAC	gain	GDF7
CLAC	gain	GFER
CLAC	gain	HS1BP3
CLAC	gain	IFT80
CLAC	gain	IL12A
CLAC	gain	IL1RAP
CLAC	gain	IQCJ-SCHIP1
CLAC	gain	KAT2B
CLAC	gain	KCNH8
CLAC	gain	KPNA4
CLAC	gain	KRIT1
CLAC	gain	KRIT1
CLAC	gain	LAPTM4A
CLAC	gain	LEPREL1
CLAC	gain	LPP
CLAC	gain	LRRD1
CLAC	gain	LRRD1
CLAC	gain	many
CLAC	gain	MASP1
CLAC	gain	MATN3
CLAC	gain	NMD3
CLAC	gain	NOXO1
CLAC	gain	NTHL1
CLAC	gain	OR14C36
CLAC	gain	OR14I1
CLAC	gain	OR2G6
CLAC	gain	OR2T11
CLAC	gain	OR2T27
CLAC	gain	OR2T6
CLAC	gain	OSBPL6
CLAC	gain	OSR1
CLAC	gain	OTOL1
CLAC	gain	PEX1
CLAC	gain	PKD1
CLAC	gain	PLEKHA3
CLAC	gain	PP2D1
CLAC	gain	PPM1L
CLAC	gain	PRKRA
CLAC	gain	PUM2
CLAC	gain	RAB26
CLAC	gain	RAB5A_CANFA
CLAC	gain	RBM45
CLAC	gain	RBM48
CLAC	gain	RHOB
CLAC	gain	RPL39L(human)
CLAC	gain	RTP4
CLAC	gain	SDC1
CLAC	gain	SESTD1
CLAC	gain	SESTD1
CLAC	gain	SGOL1
CLAC	gain	SLC9A3R2
CLAC	gain	SMC4
CLAC	gain	SMS_CANFA
CLAC	gain	SPTSSB
CLAC	gain	TBL3
CLAC	gain	TMEM207
CLAC	gain	TNFRSF1B
CLAC	gain	TP63
CLAC	gain	TPRG1
CLAC	gain	TPRG1(human)
CLAC	gain	TRAF7
CLAC	gain	TRIM59
CLAC	gain	TRIO
CLAC	gain	TSC2
CLAC	gain	TTC32
CLAC	gain	UBE2E3
CLAC	gain	UBE2E3
CLAC	gain	VPS13D
CLAC	gain	VPS13D
CLAC	gain	ZNF385B
CLAC	gain	ZNF385B
CLAC	gain	ZNF385D
CLAC	gain	ZNF385D(human)
CLAC	gain	ZNF598
CLAC	gain	ENSCAFG00000019472
CLAC	gain	RNF151
CLAC	gain	NDUFB10
CLAC	gain	CFRNASEQ_PROT_00157785
CLAC	gain	RPL3L(human)
CLAC	gain	CFRNASEQ_PROT_00157787
CLAC	gain	CFRNASEQ_PROT_00157788
CLAC	gain	CFRNASEQ_PROT_00157789
CLAC	gain	CFRNASEQ_PROT_00157790
CLAC	gain	SEPX1(human)
CLAC	gain	HS3ST6
CLAC	gain	MEIOB
CLAC	gain	ENSCAFG00000030458
CLAC	gain	CFRNASEQ_PROT_00157811
CLAC	gain	CFRNASEQ_PROT_00157812
CLAC	gain	NUBP2
CLAC	gain	IGFALS
CLAC	gain	ENSCAFG00000019495
CLAC	gain	CFRNASEQ_PROT_00162285
CLAC	gain	MRPS34
CLAC	gain	MAPK8IP3
CLAC	gain	NME3
CLAC	gain	HN1L
CLAC	gain	CRAMP1L
CLAC	gain	ENSCAFG00000019542
CLAC	gain	TMEM204
CLAC	gain	TELO2
CLAC	gain	ENSCAFG00000029361
CLAC	gain	ENSCAFG00000031348
CLAC	gain	CLCN7
CLAC	gain	C16orf91
CLAC	gain	UNKL
CLAC	gain	GNPTG
CLAC	gain	TSR3
CLAC	gain	BAIAP3
CLAC	gain	CFRNASEQ_PROT_00162343
CLAC	gain	CFRNASEQ_PROT_00162344
CLAC	gain	UBE2I
CLAC	gain	TRYM_CANFA
CLAC	gain	TRYT_CANFA
CLAC	gain	CACNA1H
CLAC	gain	ENSCAFG00000019597
CLAC	gain	SSTR5
CLAC	gain	SOX8
CLAC	gain	ENSCAFG00000030543
CLAC	gain	LMF1
CLAC	gain	MSLN
CLAC	gain	GNG13
CLAC	gain	CHTF18
CLAC	gain	RPUSD1
CLAC	gain	MSLNL
CLAC	gain	NARFL
CLAC	gain	HAGHL
CLAC	gain	CCDC78
CLAC	gain	METRN
CLAC	gain	FBXL16
CLAC	gain	WDR24
CLAC	gain	JMJD8
CLAC	gain	STUB1
CLAC	gain	WDR90
CLAC	gain	C16orf13
CLAC	gain	WFIKKN1
CLAC	gain	PIGQ
CLAC	gain	NHLRC4
CLAC	gain	C16orf11
CLAC	gain	SOLH
CLAC	gain	RAB11FIP3
CLAC	gain	DECR2
CLAC	gain	ENSCAFG00000019677
CLAC	gain	ENSCAFG00000032180
CLAC	gain	MRPL28
CLAC	gain	AXIN1
CLAC	gain	ARHGDIG
CLAC	gain	RGS11
CLAC	gain	ITFG3
CLAC	gain	LUC7L
CLAC	gain	HBQ1(human)
CLAC	gain	HBA_CANFA
CLAC	gain	HBM
CLAC	gain	ENSCAFG00000028569
CLAC	gain	NPRL3
CLAC	gain	ENSCAFG00000024468
CLAC	gain	MPG
CLAC	gain	RHBDF1
CLAC	gain	ENSCAFG00000028465
CLAC	gain	SNRNP25
CLAC	gain	IL9R
CLAC	loss	CARD8
CLAC	loss	ARHGAP15
CLAC	loss	ARHGAP24
CLAC	loss	C8orf48
CLAC	loss	CCL20
CLAC	loss	CFRNASEQ_PROT_00045078
CLAC	loss	CFRNASEQ_PROT_00058916
CLAC	loss	CFRNASEQ_PROT_00058970
CLAC	loss	CFRNASEQ_PROT_00059069
CLAC	loss	CFRNASEQ_PROT_00059176
CLAC	loss	CFRNASEQ_PROT_00059550
CLAC	loss	CFRNASEQ_PROT_00060649
CLAC	loss	CFRNASEQ_PROT_00060650
CLAC	loss	CFRNASEQ_PROT_00060651
CLAC	loss	CFRNASEQ_PROT_00093903
CLAC	loss	CFRNASEQ_PROT_00123107
CLAC	loss	CFRNASEQ_PROT_00123176
CLAC	loss	CFRNASEQ_PROT_00123233
CLAC	loss	DMD
CLAC	loss	DNER
CLAC	loss	DPP10
CLAC	loss	ENSCAFG00000007469
CLAC	loss	ENSCAFG00000009954
CLAC	loss	ENSCAFG00000009965
CLAC	loss	ENSCAFG00000010553
CLAC	loss	ENSCAFG00000013221
CLAC	loss	ENSCAFG00000013264
CLAC	loss	ENSCAFG00000014432
CLAC	loss	ENSCAFG00000014968
CLAC	loss	ENSCAFG00000015176
CLAC	loss	ENSCAFG00000017850
CLAC	loss	ENSCAFG00000023349
CLAC	loss	ENSCAFG00000024630
CLAC	loss	ENSCAFG00000024643
CLAC	loss	ENSCAFG00000028889
CLAC	loss	ENSCAFG00000028979
CLAC	loss	ENSCAFG00000029279
CLAC	loss	ENSCAFG00000029863
CLAC	loss	ENSCAFG00000030677
CLAC	loss	ENSCAFG00000031071
CLAC	loss	ENSCAFG00000031160
CLAC	loss	ENSCAFG00000031196
CLAC	loss	ENSCAFG00000031273
CLAC	loss	ENSCAFG00000031786
CLAC	loss	ENSCAFG00000032229
CLAC	loss	ENSCAFG00000032328
CLAC	loss	FAM190A
CLAC	loss	HERC2
CLAC	loss	IL1RAPL2
CLAC	loss	KYNU
CLAC	loss	LRP1B(human)
CLAC	loss	MSR1
CLAC	loss	OCA2(human)
CLAC	loss	OR51F1
CLAC	loss	PID1
CLAC	loss	PIWIL2
CLAC	loss	POLR3D
CLAC	loss	PPP3CC
CLAC	loss	RHG07_CANFA
CLAC	loss	SGCZ
CLAC	loss	SLC19A3
CLAC	loss	SLC39A14
CLAC	loss	SPHKAP
CLAC	loss	TUSC3
CLAC	loss	TUSC7
CLAC	loss	UNC13C
CLAC	loss	WDR69
CLAC	loss	WDR72
